# Supplementary material for: Reactivity of Bromine Radical with Dissolved Organic Matter Moieties and Monochloramine: Effect on Bromate Formation during Ozonation
Source: PubMed Central journal article supplement — Environ Sci Technol. 2023 Jan 27;57(47):18658–67. doi: 10.1021/acs.est.2c07694 (PMC10690713; doi:10.1021/acs.est.2c07694), 2023-01-27
Supplement: es2c07694_si_001.pdf [file es2c07694_si_001.pdf]

## Supporting Information

for *Environmental Science & Technology*

### Reactivity of bromine radical with dissolved organic matter moieties and monochloramine: Effect on bromate formation during ozonation

Sungeun Lim,<sup>1†</sup> Benjamin Barrios,<sup>2</sup> Daisuke Minakata,<sup>2</sup> Urs von Gunten<sup>1,3\*</sup>

<sup>1</sup>Eawag, Swiss Federal Institute of Aquatic Science and Technology, Ueberlandstrasse 133, 8600 Duebendorf, Switzerland

<sup>2</sup>Department of Civil and Environmental Engineering, Michigan Technological University, 1400 Townsend Drive, Houghton, Michigan 49931, United States

<sup>3</sup>School of Architecture, Civil and Environmental Engineering (ENAC), École Polytechnique Fédérale de Lausanne (EPFL), 1015 Lausanne, Switzerland

<sup>†</sup>Current address: Department of Civil and Environmental Engineering, Stanford University, 473 Via Ortega, Stanford, CA 94305, United States

\*Corresponding author: [vongunten@eawag.ch](mailto:vongunten@eawag.ch), phone: +41 58 765 5270

This **Supporting Information** includes 18 texts, 10 tables, 21 figures, and 1 scheme in 45 pages.

## Table of contents

|                                                                                                                                                                                                            |     |
|------------------------------------------------------------------------------------------------------------------------------------------------------------------------------------------------------------|-----|
| Text S1. Chemical reagents and stock solutions .....                                                                                                                                                       | S6  |
| Text S2. Preparation of DOM stock solution.....                                                                                                                                                            | S6  |
| Text S3. Preparation of chloride-free monochloramine (NH <sub>2</sub> Cl) stock solutions .....                                                                                                            | S6  |
| Text S4. Dosimetry .....                                                                                                                                                                                   | S7  |
| Text S5. Sample preparation for kinetic experiments performed with $\gamma$ -radiolysis .....                                                                                                              | S8  |
| Text S6. Dissolved O <sub>2</sub> in $\gamma$ -radiolysis samples.....                                                                                                                                     | S9  |
| Text S7. Masking bromide by Ag <sup>+</sup> .....                                                                                                                                                          | S9  |
| Text S8. Adapted competition kinetics for determining $k_{Br^{\bullet}}$ of DOM and NH <sub>2</sub> Cl.....                                                                                                | S10 |
| Text S9. Sample preparation for $\gamma$ -radiolysis for phenol-Br <sup>•</sup> reaction experiments.....                                                                                                  | S10 |
| Text S10. Chromatographic methods .....                                                                                                                                                                    | S11 |
| Text S11. Ozonation experiment .....                                                                                                                                                                       | S12 |
| Text S12. Quantum chemical calculation methods .....                                                                                                                                                       | S12 |
| Text S13. Validation of quantum chemical calculation methods .....                                                                                                                                         | S13 |
| Text S14. Calculation of free energy of activation by the Marcus theory .....                                                                                                                              | S13 |
| Text S15. LC-HRMS/MS evidences supporting the formation of C <sub>6</sub> H <sub>3</sub> BrO <sub>3</sub> and C <sub>6</sub> H <sub>5</sub> BrO <sub>3</sub> for the phenol-Br <sup>•</sup> reaction ..... | S14 |
| Text S16. Formation pathway of 4-bromophenol from the phenol-Br <sup>•</sup> reaction.....                                                                                                                 | S15 |
| Text S17. Principles of the chlorine-ammonia pretreatment as a bromate mitigation strategy of ozonation .....                                                                                              | S16 |
| Text S18. Calculation of the fractions of Br <sup>•</sup> -related reactions during ozonation .....                                                                                                        | S16 |
| Table S1. Chemical reagents .....                                                                                                                                                                          | S18 |
| Table S2. Compounds analyzed by HPLC and LC-HRMS/MS and the corresponding analytical condition and LOQ. ....                                                                                               | S19 |
| Table S3. Detected exact masses and mass deviation by LC-HRMS/MS. ....                                                                                                                                     | S19 |
| Table S4. Theoretically calculated $\Delta G_{\text{solv,calc}}$ values and experimental values of halides and halogen radicals in kcal/mol. n is the number of explicit water molecule(s). ....           | S20 |

|                                                                                                                                                                                                                                                                                                                                                                                                                                                                                                                                                                                                                                                                     |     |
|---------------------------------------------------------------------------------------------------------------------------------------------------------------------------------------------------------------------------------------------------------------------------------------------------------------------------------------------------------------------------------------------------------------------------------------------------------------------------------------------------------------------------------------------------------------------------------------------------------------------------------------------------------------------|-----|
| Table S5. Benchmark calculations of one electron reduction potential of Br <sup>•</sup> /Br <sup>-</sup> . .....                                                                                                                                                                                                                                                                                                                                                                                                                                                                                                                                                    | S20 |
| Table S6. Validation of one electron reduction potential for selected organic compounds at the M06-2X/Aug-cc-pVDZ//M06-2X/Aug-cc-pVTZ level of theory with the SMD solvation model .....                                                                                                                                                                                                                                                                                                                                                                                                                                                                            | S20 |
| Table S7. Calculated free energy of adduct formation ( $\Delta G^{\text{adduct}}_{\text{aq}}$ ) for the reactions of organic model compounds with Br <sup>•</sup> (red sphere) and the optimized molecular structures of the adducts.....                                                                                                                                                                                                                                                                                                                                                                                                                           | S21 |
| Table S8. Compiled QC calculation results for the reactions of the selected organic model compounds and of NH <sub>2</sub> Cl with Br <sup>•</sup> ( $\Delta G^{\text{react}}_{\text{aq,calc}}$ as the standard state aqueous phase free energy of reaction, $\lambda$ as the reorganization energy, and $\Delta G^{\text{act}}_{\text{aq,SET}}$ as the aqueous phase free energy of activation). .....                                                                                                                                                                                                                                                             | S25 |
| Table S9. Spin density distribution of protonated and deprotonated forms of benzylamine and <i>N,N</i> -dimethylbenzylamine.....                                                                                                                                                                                                                                                                                                                                                                                                                                                                                                                                    | S27 |
| Table S10. Scavenging rates ( $k_{\text{species}}, \text{s}^{-1}$ ) of e <sup>-</sup> , <sup>•</sup> OH, <sup>•</sup> H, Br <sup>•</sup> , and <sup>•</sup> tBA ( <i>t</i> -butanol derived radical) by the reaction species in $\gamma$ -radiolysis kinetic experiments (1,2-dibromoethane (1,2-DBE), Ag <sup>+</sup> , <i>t</i> -butanol, a model compound, phosphate ions (H <sub>2</sub> PO <sub>4</sub> <sup>-</sup> /HPO <sub>4</sub> <sup>2-</sup> for pH 7), and dissolved O <sub>2</sub> ), based on the reported or assumed second-order rate constants ( $k_{\text{species}}, \text{M}^{-1}\text{s}^{-1}$ ) and the applied concentrations (conc., M) .. | S27 |
| Figure S1. Total chloride concentrations ([Cl <sup>-</sup> ] <sub>tot</sub> ) of primary NH <sub>2</sub> Cl stock solutions after reducing NH <sub>2</sub> Cl by sulfite. [Cl <sup>-</sup> ] <sub>tot</sub> indicates the sum of the chloride concentration already present in the stock solution and chloride formed from the reduction of NH <sub>2</sub> Cl with sulfite. The NH <sub>2</sub> Cl concentration of the stock solution was 0.38 mM.....                                                                                                                                                                                                            | S28 |
| Figure S2. Left: Determined and theoretical NH <sub>2</sub> Cl concentrations in supernatant of the silver(I)-treated NH <sub>2</sub> Cl stock solutions (as 0.4mM, 1.7mM and 3.5mM NH <sub>2</sub> Cl); right: measured chloride concentrations in 0.2 mM NH <sub>2</sub> Cl solutions prepared by diluting 0.4, 1.7, or 3.5 mM NH <sub>2</sub> Cl stock solutions and reducing NH <sub>2</sub> Cl of each solution by sulfite.....                                                                                                                                                                                                                                | S28 |
| Figure S3. Setup for preparing $\gamma$ -radiolysis samples for the competition kinetics experiments. To transfer the Ar-saturated solution to the sample vials containing an air-saturated solution (shown as 1.5mL amber vials with crimp neck), the transferring tubing was placed to the bottom of the vials. ....                                                                                                                                                                                                                                                                                                                                              | S29 |
| Figure S4. Flow charts of the sample preparation for kinetic experiments performed with $\gamma$ -radiolysis for (a) most organic model compounds, (b) <i>p</i> -benzoquinone, and (c) benzene, toluene, and naphthalene. DBE stands for 1,2-dibromoethane. Background shades separate the days on which an individual step (preparation, $\gamma$ -radiolysis, and analyses) was carried out. ....                                                                                                                                                                                                                                                                 | S30 |

Figure S5. Competition kinetics plots for the reactions of Br<sup>•</sup> with the organic model compounds, NH<sub>2</sub>Cl, DOM, and oxidized DOM (by 0.8 gO<sub>3</sub>/gC or 1.5 gO<sub>3</sub>/gC) at pHs 7.1 or 10.2. Concentrations of the model compounds were fixed at 3.0 – 3.4 μM. Concentrations of NH<sub>2</sub>Cl, DOM, and oxidized DOM are stated in the figure headings. Data points are from a single measurement and *k*<sub>Br<sup>•</sup></sub> was calculated mostly based on an average of experimental duplicates..... S33

Figure S6. Slopes obtained by linear regression of data points of the competition kinetics plots (shown in Figure S5) as a function of a reciprocal of the DOC or NH<sub>2</sub>Cl concentration, to derive *k*<sub>Br<sup>•</sup></sub> for NH<sub>2</sub>Cl, DOM, and oxidized DOM (by 0.8 gO<sub>3</sub>/gC or 1.5 gO<sub>3</sub>/gC). See Text S8 for the corresponding rate expression.S34

Figure S7. Quantitative structure-activity relationship of the measured *k*<sub>Br<sup>•</sup></sub> of the selected aromatic model compounds with (a) Hammett constants and (b) computed activation energies..... S34

Figure S8. Schematic reaction coordinate for the reaction of phenol with Br<sup>•</sup>..... S35

Figure S9. Correlation between the measured *k*<sub>Br<sup>•</sup></sub> of the selected organic model compounds and aqueous phase free energies for the formation of adducts ( $\Delta G^{\text{adduct}}_{\text{aq}}$ ). ..... S35

Figure S10. Concentrations of phenol and the identified products as a function of the  $\gamma$ -radiolysis time during the reaction of phenol with Br<sup>•</sup>, for the condition with 22 μM phenol, 0.7 mM 1,2-dibromoethane, 40 mM *t*-butanol, and 50 mM phosphate buffer (pH 7.1). See Figure 2 (main text) for relative product formation. .... S36

Figure S11. Left: Filtered chromatograms of a blank sample (no  $\gamma$ -radiolysis); right:  $\gamma$ -radiolysis sample (t = 40 min) with exact masses of 200.9193, 202.9172, 202.9349, and 204.9329 (from top to bottom of the chromatograms) corresponding to the molecular formulas of C<sub>6</sub>H<sub>3</sub><sup>79</sup>BrO<sub>3</sub>, C<sub>6</sub>H<sub>3</sub><sup>81</sup>BrO<sub>3</sub>, C<sub>6</sub>H<sub>5</sub><sup>79</sup>BrO<sub>3</sub>, and C<sub>6</sub>H<sub>5</sub><sup>81</sup>BrO<sub>3</sub>. ..... S36

Figure S12. Trends of the peak intensity as a function of the  $\gamma$ -radiolysis time for the exact masses of 200.9193 (blue circles, corresponding to C<sub>6</sub>H<sub>2</sub><sup>79</sup>BrO<sub>3</sub> as M-H) and 202.9349 (orange triangles, corresponding to C<sub>6</sub>H<sub>4</sub><sup>79</sup>BrO<sub>3</sub> as M-H) during the reaction of Br<sup>•</sup> with phenol (left) or *p*-benzoquinone (right). ..... S37

Figure S13. Left: Filtered chromatograms of a  $\gamma$ -radiolysis sample (t = 40 min); right: synthesized substituted *p*-benzoquinone with the exact masses of 200.9193, 202.9172, 202.9349, and 204.9329 (from top to bottom of the chromatograms) as [M-H], corresponding to the molecular formulas C<sub>6</sub>H<sub>3</sub><sup>79</sup>BrO<sub>3</sub>, C<sub>6</sub>H<sub>3</sub><sup>81</sup>BrO<sub>3</sub>, C<sub>6</sub>H<sub>5</sub><sup>79</sup>BrO<sub>3</sub>, and C<sub>6</sub>H<sub>5</sub><sup>81</sup>BrO<sub>3</sub>. Retention times for C<sub>6</sub>H<sub>3</sub>BrO<sub>3</sub>, and C<sub>6</sub>H<sub>5</sub>BrO<sub>3</sub> are 7.8

and 6.1 min for the  $\gamma$ -radiolysis sample (left) and 11.9 and 8.7 min for the synthesized chemical (right).  
..... S37

Figure S14. MS<sup>2</sup> spectra of m/z of 123.0089 (as [M-H]) with a HCD normalized collision energy (unitless) of 15 (top), 45 (middle), or 60 (bottom). ..... S38

Figure S15. Simulated fragment ions corresponding to the detected major daughter ions of m/z = 95.0140 and 68.9974. Two different suspected structures are shown for the parent ion of 123.0089 as [M-H]. The fragment ions were obtained based on an *in silico* fragmentation simulation by MetFrag.<sup>48</sup>  
..... S38

Figure S16. Top: Measured; bottom: reported MS<sup>2</sup> spectra for the exact masses of 185.0610 and 185.0608, respectively (both corresponding to C<sub>12</sub>H<sub>9</sub>O<sub>2</sub> as M-H). The reported MS<sup>2</sup> spectrum was obtained from <https://massbank.eu/MassBank/>.<sup>49</sup> ..... S39

Figure S17. Resonance structures of the phenoxy radical..... S39

Figure S18. Calculated fractions of Br<sup>•</sup> reacting with DOM (green line), ozone (red line), bromide (blue line), or NH<sub>2</sub>Cl (orange line) as a function of the ozone concentration in (a) absence or (b) presence of NH<sub>2</sub>Cl. The selected concentrations were 5 mgC/L DOC, 1.3  $\mu$ M Br<sup>-</sup> (100  $\mu$ g/L Br<sup>-</sup>), and 15  $\mu$ M NH<sub>2</sub>Cl.S40

Figure S19. Calculated fractions of Br<sup>•</sup> reacting with NH<sub>2</sub>Cl as a function of (a) bromide, (b) ozone, or (c) DOC concentration. Lines indicate modelled NH<sub>2</sub>Cl concentrations (1, 2, 5, 10, and 15  $\mu$ M) and an asterisk symbol indicates the conditions applied in the ozonation experiment. Bromide, ozone, and DOC concentrations were fixed at 2  $\mu$ M, 60  $\mu$ M, and 1.4 mgC/L (corresponding to the experimental conditions) when they were not an independent variable of the plot. .... S40

Figure S20. (a) *p*CBA abatement as a function of the ozone exposure and (b) ozone decrease as a function of reaction time, for ozonation of Lake Zurich water (1.4 mgC/L DOM, 2  $\mu$ M bromide, 1 mM phosphate buffer (pH 7.6), 5  $\mu$ M *p*CBA, and an ozone dose of 60  $\mu$ M in absence or presence of an additional agent (10  $\mu$ M formate, 4  $\mu$ M ammonium, 7  $\mu$ M NH<sub>2</sub>Cl, or 15  $\mu$ M NH<sub>2</sub>Cl). The numbers in parentheses in the legend in plot (a) indicate the R<sub>ct</sub> derived from the slopes of the regression lines.S41

Figure S21. Fraction of Br<sup>•</sup> in equilibrium with BrOH<sup>-•</sup> as a function of pH..... S41

Scheme S1. Possible initial reaction pathways for the reaction of phenol with Br<sup>•</sup>..... S42

References ..... S43

### Text S1. Chemical reagents and stock solutions

The chemical reagents used in this study are summarized in Table S1. Hypochlorite solution was standardized spectrophotometrically ( $\epsilon_{290\text{nm}} = 350 \text{ M}^{-1} \text{ cm}^{-1}$ ).<sup>1</sup> Dissolved organic matter (DOM) and monochloramine ( $\text{NH}_2\text{Cl}$ ) stock solutions were prepared as described in Text S2 and Text S3, respectively. All solutions were prepared in ultrapure water with a resistivity of 18.2  $\text{M}\Omega\cdot\text{cm}$ . Lake Water Zurich was collected at Zurich Water Supply (Lengg) and filtered on the same day of collection with a cellulose nitrate filter (0.45  $\mu\text{m}$ , Sartorius Stedim Biotech). General water quality parameters of the filtered Lake water were analyzed by the AuA laboratory (Eawag, Dübendorf) and summarized as follows: pH 8.3, alkalinity 2.69 mM, hardness 1.49 mM, bromide < 0.05 mg/L, nitrate 0.7 mg/L as  $\text{NO}_3^-$ -N, ammonium < 5.0  $\mu\text{g/L}$  as  $\text{NH}_4^+$ -N, nitrite < 1.0  $\mu\text{g/L}$  as  $\text{NO}_2^-$ -N, and DOC 1.4 mg/L.

### Text S2. Preparation of DOM stock solution

A 50 mgC/L DOM stock solution was prepared by dissolving the corresponding amount of Suwannee River Fulvic Acid II (2S101F, IHSS, 52.34%(w/w), <https://humic-substances.org/>) in 20 mM phosphate buffer at pH 7. The stock solution was standardized based on UV absorbance at 254nm after diluting 5 times.<sup>2</sup> An ozonated DOM stock solution was prepared with two ozone doses (0.8  $\text{gO}_3/\text{gC}$  and 1.5  $\text{gO}_3/\text{gC}$ ) and ozone was completely consumed over night. Due to the dilution, the final concentrations of the oxidized DOM stock solutions were 33 mgC/L (0.8  $\text{gO}_3/\text{gC}$ ) and 26 mgC/L (1.5  $\text{gO}_3/\text{gC}$ ). To control the extent of oxidation, the electron donating capacity (EDC) of the DOM stock solutions was measured before and after ozonation by an EDC assay using the radical cation of 2,2'-azino-bis(3-ethylbenzothiazoline-6-sulfonate) (ABTS<sup>•+</sup>) as described by Walpen et al. (2020).<sup>3</sup> The decrease in EDC of the DOM stock solution after ozonation was (31  $\pm$  5)% for 0.8  $\text{gO}_3/\text{gC}$  and (40  $\pm$  4)% for 1.5  $\text{gO}_3/\text{gC}$ , in a similar range of previously reported EDC of ozonated DOM solutions.<sup>4,5</sup>

### Text S3. Preparation of chloride-free monochloramine ( $\text{NH}_2\text{Cl}$ ) stock solutions

Hypochlorite solution contains high concentrations of chloride from the manufacturing process. The presence of chloride in  $\text{NH}_2\text{Cl}$  stock solution would interfere determining  $k_{\text{Br}\cdot}$  of  $\text{NH}_2\text{Cl}$ , because chloride can react fast with  $\text{Br}\cdot$  as shown in Eq. S1.

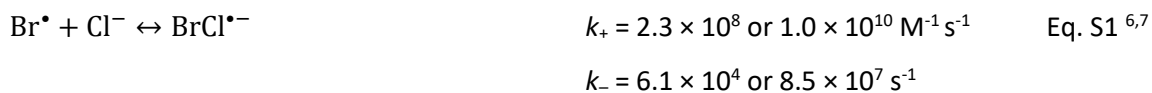

To prevent this interference, chloride in prepared  $\text{NH}_2\text{Cl}$  stock solution was removed by a following description. A primary  $\text{NH}_2\text{Cl}$  stock solution was prepared by mixing 15 mM of sodium hypochlorite (at

pH 9.5 by NaOH) with 7.5 mM of diammonium sulfate at a mixing ratio of 1:1 by a syringe pump with a speed of 1 mL/min. The resulting solution produced ( $6.9 \pm 0.1$ ) mM  $\text{NH}_2\text{Cl}$  as a main species with a negligible impurity of  $\text{NHCl}_2$  (up to 0.1 mM), determined by UV absorbance at 245 and 295 nm and the corresponding molar absorptivity coefficients ( $\epsilon_{245, \text{NH}_2\text{Cl}} = 445 \text{ M}^{-1} \text{ cm}^{-1}$ ,  $\epsilon_{245, \text{NHCl}_2} = 208 \text{ M}^{-1} \text{ cm}^{-1}$ ,  $\epsilon_{295, \text{NH}_2\text{Cl}} = 14 \text{ M}^{-1} \text{ cm}^{-1}$ ,  $\epsilon_{295, \text{NHCl}_2} = 267 \text{ M}^{-1} \text{ cm}^{-1}$ ).<sup>8</sup>

To prepare a chloride-free  $\text{NH}_2\text{Cl}$  stock solution, the amount of chloride ( $\text{Cl}^-$ ) present in the primary  $\text{NH}_2\text{Cl}$  stock solution was first determined by diluting the stock solution to 0.4 – 0.5 mM  $\text{NH}_2\text{Cl}$ , subsequently reducing  $\text{NH}_2\text{Cl}$  to  $\text{Cl}^-$  with sulfite, and measuring a total  $\text{Cl}^-$  concentration (as a sum of  $\text{Cl}^-$  present in the diluted stock and  $\text{Cl}^-$  reduced from  $\text{NH}_2\text{Cl}$ ) by ion chromatography (Text S10).  $\text{NH}_2\text{Cl}$  was completely reduced by 1.0 – 1.5 molar equivalent of sulfite relative to  $\text{NH}_2\text{Cl}$  (Figure S1). The total  $[\text{Cl}^-]$  was 1.4 – 1.6 mM in the diluted  $\text{NH}_2\text{Cl}$  stock solutions and therefore the  $[\text{Cl}^-]$  already present in the solutions was 1.0 – 1.2 mM. After determining  $[\text{Cl}^-]$ , the primary  $\text{NH}_2\text{Cl}$  stock solution was again diluted to 0.4, 1.7, and 3.5 mM  $\text{NH}_2\text{Cl}$  and a 1.1 molar equivalent of silver ( $\text{Ag}^+$ ) with regard to the inherent  $[\text{Cl}^-]$  was added to the diluted  $\text{NH}_2\text{Cl}$  stock solutions to remove  $\text{Cl}^-$ . The silver-spiked solutions were allowed to sediment the precipitate ( $\text{AgCl}$ ) for > 6 h. Afterwards, the supernatant was taken to measure  $[\text{NH}_2\text{Cl}]$  by a DPD method<sup>9</sup> to check an effect of the silver addition on  $[\text{NH}_2\text{Cl}]$ . The determined  $[\text{NH}_2\text{Cl}]$  by DPD were within  $\pm 3\%$  from the theoretical  $[\text{NH}_2\text{Cl}]$  (except for the stock solution with the lowest  $[\text{NH}_2\text{Cl}]$ , 0.4 mM, deviated by 27%) (Figure S2a), and thus the effect was negligible. The supernatant was also taken to measure total  $[\text{Cl}^-]$  by IC, by diluting the 0.4, 1.7, and 3.5 mM  $\text{NH}_2\text{Cl}$  stock solutions to 0.2 mM  $\text{NH}_2\text{Cl}$  and reducing  $\text{NH}_2\text{Cl}$  by sulfite. The measured  $[\text{Cl}^-]$  were 0.18 – 0.19 mM, close to the theoretical  $[\text{NH}_2\text{Cl}]$  (0.2 mM) (Figure S2b), indicating that only limited  $\text{Cl}^-$  is present in the supernatant of the  $\text{NH}_2\text{Cl}$  stock solutions. As a result, the supernatant of the silver-spiked  $\text{NH}_2\text{Cl}$  stock solution was used for determining  $k_{\text{Br}^\bullet}$ .

#### Text S4. Dosimetry

The dose rate was determined by an air-saturated 1 mM formate solution prepared in 2 mM phosphate buffer at pH 6.5 where all reactive species (solvated electron ( $e^-$ ),  $^{\bullet}\text{OH}$ ,  $\text{H}^{\bullet}$ ) are converted to hydrogen peroxide.<sup>10</sup> Hydrogen peroxide formed in the solution over time (0 – 15 min) was quantified spectrophotometrically by the Allen's reagent<sup>11</sup> and used to calculate the dose rate. The calculated dose rate was 0.13 kGy/h, corresponding to the electron formation rate ( $fr(e^-)$ ) of 9.7 nM/s and the  $\text{Br}^\bullet$  formation rate ( $fr(\text{Br}^\bullet)$ ) of 9.7 nM/s by assuming a 100% conversion of  $e^-$  to  $\text{Br}^\bullet$  (from the reaction of  $e^-$  with 1,2-dibromoethane).

### Text S5. Sample preparation for kinetic experiments performed with $\gamma$ -radiolysis

$\gamma$ -radiolysis of aqueous solution produces  $e^-$ ,  $^{\bullet}\text{OH}$ ,  $\text{H}^{\bullet}$ , and  $\text{H}_2\text{O}_2$  as reactive species with  $e^-$  and  $^{\bullet}\text{OH}$  being the major species. For generating  $\text{Br}^{\bullet}$ , 1,2-dibromoethane was used, which forms  $\text{Br}^{\bullet}$  by the reaction with  $e^-$ , according to the Eqs. S2 and S3. The other major reactive species,  $^{\bullet}\text{OH}$ , was quenched by *t*-butanol to avoid interferences for the oxidation of probe compounds and guarantee a high yield of  $\text{Br}^{\bullet}$  from the reaction of 1,2-dibromoethane with  $e^-$ . The scavenging of  $e^-$  by 1,2-dibromoethane was at least 84% (depending on the dissolved  $\text{O}_2$  concentration) of the total scavenging rate of  $e^-$  (Table S10).

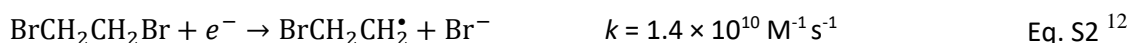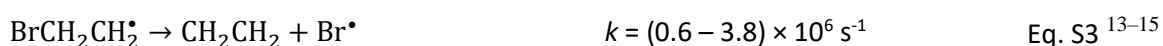

The formed  $\text{Br}^{\bullet}$  is in equilibrium with hydroxide ( $\text{BrOH}^{\bullet-} \leftrightarrow \text{Br}^{\bullet} + \text{HO}^-$ ,  $K_{\text{eq}} = 3.2 \times 10^{-4} \text{ M}$ )<sup>16</sup> and therefore affected by pH. Under the pH conditions we applied (pH 7 and 10), the equilibrium clearly favors  $\text{Br}^{\bullet}$ , with the fraction of  $\text{Br}^{\bullet}$  as 100% and 76%, respectively. The fraction of  $\text{Br}^{\bullet}$  as a function of pH calculated based on the reported  $K_{\text{eq}}$  is shown in Figure S21.

Sample preparation is illustrated in Figure S3 for a setup image and in Figure S4 as flow charts. Samples for most organic model compounds (except *p*-benzoquinone, benzene, toluene, and naphthalene) were prepared one day prior to  $\gamma$ -radiolysis. 100 mL of solution containing 4  $\mu\text{M}$  of ibuprofen, 4  $\mu\text{M}$  of an organic model/target compound, and 50 mM phosphate buffer (pH 7.1) or 50 mM borate buffer (pH 10.2) was saturated with Ar gas. The Ar-saturated solution was then delivered to six 1.5 mL amber vials containing 0.21 mL of air-saturated solution of 5 mM of 1,2-dibromoethane and 29 mM of *t*-butanol, via a transferring tubing under  $\text{N}_2$  gas flow, roughly until the neck of each vial (see Figure S3 for setup image). By mixing of Ar- and air-saturated solutions a certain level of dissolved oxygen (see below) could be achieved for the reasons described in Text S6. After the transfer, the vials were immediately closed with crimp caps to minimize gas exchange with the atmosphere. Mixed concentrations of the reactants in the vials were 3.4  $\mu\text{M}$  ibuprofen, 3.4  $\mu\text{M}$  target compound, 0.7 mM 1,2-dibromoethane, and 4 mM *t*-butanol. Each vial represented a designated  $\gamma$ -radiolysis time (0, 4, 8, 12, 16, and 20 min).

Samples for experiments with *p*-benzoquinone were prepared according to the description above, except that *p*-benzoquinone was added to the sample solution on site just before  $\gamma$ -radiolysis to minimize its loss. 10  $\mu\text{L}$  of a 0.6 mM *p*-benzoquinone solution was added to roughly 1.5 mL of the pre-mixed solution containing ibuprofen, 1,2-dibromoethane, and *t*-butanol, using a glass syringe through the septum of the crimp caps. The weight of the vials was determined before and after adding *p*-



benzoquinone, to account for deviations in the final concentration of *p*-benzoquinone, caused by differences in sample volumes across the vials.

Samples for benzene, toluene, and naphthalene were prepared on site. 90 mL of a solution containing 3.3  $\mu\text{M}$  ibuprofen and 50 mM phosphate buffer (pH 7.1) was placed in a 150 mL reaction vessel and saturated with Ar. 10 mL of an air-saturated solution containing 5 mM 1,2-dibromoethane and 20 mM *t*-butanol and 300  $\mu\text{L}$  of 1 mM organic compound (benzene, toluene, or naphthalene) were added to the Ar-saturated solution and immediately placed in the  $\gamma$ -radiolysis source. The final concentrations of the reactants were 3  $\mu\text{M}$  ibuprofen, 3  $\mu\text{M}$  target compound, 0.5 mM 1,2-dibromoethane, and 2 mM *t*-butanol. During  $\gamma$ -radiolysis, 1 mL samples were taken every 4 min up to 20 min for further analyses.

#### Text S6. Dissolved $\text{O}_2$ in $\gamma$ -radiolysis samples

$\text{O}_2$  concentrations were kept at a level to guarantee quenching of carbon-centered radicals derived from the reaction of *t*-butanol with  $\cdot\text{OH}$  ( $\cdot\text{tBA}$ ) during the radiolysis, which may oxidize target aromatic compounds,<sup>17</sup> but still low enough not to quench too much  $e^-$ . The desired  $\text{O}_2$  level was achieved by mixing Ar- and air-saturated solutions with a volumetric ratio of 6:1.  $\text{O}_2$  concentrations were measured by an optical  $\text{O}_2$  sensor (PreSens, Oxygen Microsensor NTH-PSt7). The average of  $\text{O}_2$  concentrations measured immediately after the mixing were  $(2.7 \pm 0.3) \% \text{O}_2$  saturation (equivalent to  $(35 \pm 4) \mu\text{M O}_2$ ), which slightly increased to  $(4.0 \pm 1.1) \% \text{O}_2$  saturation (or  $(52 \pm 14) \mu\text{M O}_2$ ) after 15 hours storage at room temperature. For the  $\text{O}_2$  concentration of  $\sim 70 \mu\text{M}$  (highest possible  $\text{O}_2$ ), the scavenging of  $e^-$  by  $\text{O}_2$  was 11% of the total scavenging rate of  $e^-$ , while the scavenging of  $\cdot\text{tBA}$  by  $\text{O}_2$  was 92% of the total scavenging rate of  $\cdot\text{tBA}$  (Table S10). The mixed solution was treated by  $\gamma$ -radiolysis within 24 hours to minimize reintroduction of  $\text{O}_2$ .

#### Text S7. Masking bromide by $\text{Ag}^+$

The bromine radical ( $\text{Br}\cdot$ ) was generated from the reaction of 1,2-dibromoethane with  $e^-$  (Eqs. S2 and S3). The reaction inherently forms  $\text{Br}^-$  as a side product (Eq. S2) which could quench  $\text{Br}\cdot$  very efficiently (Eq. S4). To prevent this undesired  $\text{Br}\cdot$  quenching,  $\text{Br}^-$  was masked by the fast reaction with silver(I) ( $\text{Ag}^+$ , Eq. S5) by injecting 24  $\mu\text{L}$  of 0.135 mM silver nitrate solution with a Hamilton glass syringe through a rubber septum of the 1.5 mL amber vials, after every 4 min of  $\gamma$ -radiolysis treatment (total 11  $\mu\text{M Ag}^+$  added for 20 min of  $\gamma$ -radiolysis, equivalent to the expected concentration of  $\text{Br}^-$  formed).  $\text{Ag}^+$  was added in a distributed way to reduce a possibility of quenching  $\text{Br}\cdot$  by  $\text{Ag}^+$  (note that  $k_{\text{Br}\cdot}$  of  $\text{Ag}^+$  is not

available, but assumed high according to the  $k_{\bullet\text{OH}}$  of  $\text{Ag}^+$  as high as  $10^{10} \text{ M}^{-1} \text{ s}^{-1}$ ).<sup>18</sup> After the designated time (0 – 20 min with 4 min intervals), samples were taken out from the  $\gamma$ -radiation source and 40  $\mu\text{L}$  of 26.5 mM sodium chloride was added to the vial to quench potentially residual  $\text{Ag}^+$ . The same bromide-masking protocol was applied for the product analysis samples prepared in 11 mL vials, but with higher concentrations of the silver nitrate and sodium chloride stock solutions, to account for the larger volumes of the vials (i.e., 1 mM silver nitrate and 192 mM sodium chloride).

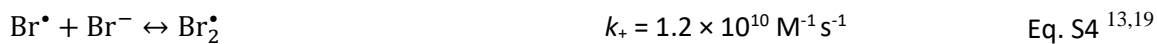

$$k_{-} = 3.1 \times 10^4 \text{ s}^{-1}$$

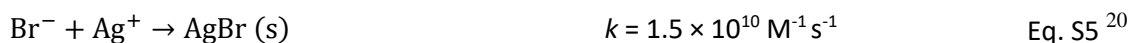

#### Text S8. Adapted competition kinetics for determining $k_{\text{Br}^{\bullet}}$ of DOM and $\text{NH}_2\text{Cl}$

$k_{\text{Br}^{\bullet}}$  of DOM was determined by measuring a decrease in ibuprofen over time under varying conditions with ibuprofen (1  $\mu\text{M}$ ) and DOC concentration variation in the range of 2 – 15 mgC/L. To derive  $k_{\text{Br}^{\bullet}}$  of DOM, a steady-state concentration of  $\text{Br}^{\bullet}$  ( $[\text{Br}^{\bullet}]_{\text{ss}}$ ) was assumed, where the formation rate ( $fr(\text{Br}^{\bullet})$ ), governed by the dose rate of the  $\gamma$ -radiation source (Text S4)), is equal to the consumption rate as expressed in Eq. S6, with X as DOM. Eq. S6 can be rearranged for  $[\text{Br}^{\bullet}]_{\text{ss}}$ , which is then approximated to Eq. S7 for the condition where  $k_{\text{Br}^{\bullet},\text{Ibu}}[\text{Ibu}] \ll k_{\text{Br}^{\bullet},\text{X}}[\text{X}]$  (X = DOM). Finally,  $k_{\text{Br}^{\bullet}}$  of DOM is derived by plotting a slope obtained by a linear regression of the  $\ln([\text{Ibu}]/[\text{Ibu}]_0)$  over time data (as shown in Figure S5) as a function of  $1/[\text{DOM}]$  (as shown in Figure S6), based on Eq. S8.  $k_{\text{Br}^{\bullet}}$  of  $\text{NH}_2\text{Cl}$  was determined accordingly but with varying  $[\text{NH}_2\text{Cl}]$  in the range of 0.01 – 0.4 mM and with X as  $\text{NH}_2\text{Cl}$  in Eqs S6 – S8.

$$fr(\text{Br}^{\bullet}) = k_{\text{Br}^{\bullet},\text{Ibu}}[\text{Br}^{\bullet}]_{\text{ss}}[\text{Ibu}] + k_{\text{Br}^{\bullet},\text{X}}[\text{Br}^{\bullet}]_{\text{ss}}[\text{X}] \quad \text{Eq. S6}$$

$$[\text{Br}^{\bullet}]_{\text{ss}} = \frac{fr(\text{Br}^{\bullet})}{k_{\text{Br}^{\bullet},\text{Ibu}}[\text{Ibu}] + k_{\text{Br}^{\bullet},\text{X}}[\text{X}]} \approx \frac{fr(\text{Br}^{\bullet})}{k_{\text{Br}^{\bullet},\text{X}}[\text{X}]} \quad \text{Eq. S7}$$

$$\ln\left(\frac{[\text{Ibu}]}{[\text{Ibu}]_0}\right) = -k_{\text{Br}^{\bullet},\text{Ibu}}[\text{Br}^{\bullet}]_{\text{ss}}t = -\frac{k_{\text{Br}^{\bullet},\text{Ibu}}}{k_{\text{Br}^{\bullet},\text{X}}} \frac{fr(\text{Br}^{\bullet})t}{[\text{X}]} \quad \text{Eq. S8}$$

#### Text S9. Sample preparation for $\gamma$ -radiolysis for phenol- $\text{Br}^{\bullet}$ reaction experiments

Samples for product analyses for the reaction of phenol with  $\text{Br}^{\bullet}$  were prepared one day prior to  $\gamma$ -radiolysis similarly to the kinetic experiments but in larger volumes. 100 mL solution containing 25  $\mu\text{M}$  of phenol and 50 mM phosphate buffer (pH 7.1) was saturated with Ar and brought to four 11 mL clear vials with 1.54 mL of air-saturated solution containing 5 mM of 1,2-dibromoethane and 286 mM of t-

butanol, via the setup described above. The final concentrations of the reactants in the vials were 22  $\mu\text{M}$  phenol, 0.7 mM 1,2-dibromoethane, and 40 mM *t*-butanol.  $\text{Ag}^+$  for masking bromide was added as described in Text S7. Samples were taken after 12, 20, and 40 min and analyzed by HPLC-DAD (or HPLC-FLD) and LC-HRMS/MS within 24 hours.

#### Text S10. Chromatographic methods

All kinetic and product samples from  $\gamma$ -radiolysis were filtered by a syringe filter (Nylon, 0.45  $\mu\text{m}$ , 4 mm) prior to analyses. Most organic model compounds and phenol- $\text{Br}^\bullet$  products (except those mentioned below) were analyzed by HPLC (Ultimate 3000, Thermo) equipped with diode array detector (DAD) and fluorescence detector (FLD) with a COSMOSIL 5C18-MS-II (3.0  $\times$  150 mm, 5  $\mu\text{m}$ ) column using a gradient method with methanol and 10 mM  $\text{H}_3\text{PO}_4$  as eluents. The gradient started at 45% methanol (i.e., 55%  $\text{H}_3\text{PO}_4$ ), gradually increased to 95% methanol for 20 min, stayed at 95% methanol for 4 min, returned to 45% methanol in 5 min, and remained at 45% methanol for 5.5 min (total analyzing time = 30 min). For hydroquinone and catechol, the same C18 column was used but with a different gradient: the gradient started at 5% methanol, increased to 95% for 25 min, stayed at 95% for 8.5 min, returned to 5% in 1 min, and remained at 5% for 5.5 min (total analyzing time = 40 min). For 3-phenylpropionic acid, the same C18 column was used but with different eluents (acetonitrile and 10 mM  $\text{H}_3\text{PO}_4$ ) and a different gradient: the gradient started at 30% acetonitrile, increased to 60% for 13 min, stayed at 60% for 15 min, returned to 30% in 0.5 min, and remained at 30% for 6.5 min (total analyzing time = 36 min). For benzylamine and *N,N*-dimethylbenzylamine, a hydrophilic interaction liquid chromatography column (XBridge™ BEH HILIC XP, 2.5  $\mu\text{m}$  particle size, 3.0  $\times$  150 mm, Waters) was used with an acetonitrile mixture (95:3:2 acetonitrile:methanol:water) and water as eluents. The gradient started at a 100% acetonitrile mixture for the first 2 min, decreased to 5% for 10 min, stayed at 5% for 5 min, returned to 100% in 1 min, and remained at 100% for 19 min (total analyzing time = 37 min). The flow rate was set at 0.4 mL/min for all analyses and the injection volume was 25  $\mu\text{L}$ . The detector setup is summarized in Table S2.

Identified and suspected products for the reaction of phenol with  $\text{Br}^\bullet$  were analyzed by LC coupled with high resolution tandem mass spectrometer (Q Exactive, Thermo Scientific). LC separation was carried out with the same C18 column as above with a gradient method using ultrapure water and methanol (both with 0.1% formic acid) as eluents A and B, respectively. The gradient started with 5% B, gradually increased to 95% B for 25 min, held at 95% B for 8.5 min, returned to 5% B for 1 min, and was maintained at 5% B for 5.5 min. The total analyzing time was 40 min. The flow rate was 0.4 mL/min and

the injection volume was 25  $\mu\text{L}$ . The MS detector was with electrospray ionization with either a full MS<sup>1</sup> scan mode (R = 35,000, mass range = 60 – 600 for all modes) with data-dependent MS<sup>2</sup> (R = 35,000) or a targeted MS<sup>2</sup> mode with an inclusion list specifying the masses of interest (corresponding to suspected phenol oxidation products) and a range of applied collision energies (15, 45, and 60 as (N)CE). Both modes were operated in positive or mostly negative polarity with a spray voltage of 4000 V (positive) or 3000 V (negative), a capillary temperature of 350 °C, a sheath gas flow rate of 40, and an auxiliary gas flow rate of 10. Detected exact masses of the phenol-Br<sup>•</sup> products and mass deviations are summarized in Table S3.

Samples containing chloride and bromate were first diluted with ultrapure water (100 times for chloride, 10 times for bromate) and analyzed by ion chromatography coupled with conductivity detector (Dionex™ Integrion™ HPIC™ System) with an anion exchange IC column (Dionex™ IonPac™ AS19-4 $\mu\text{m}$  IC Column 2  $\times$  250mm with AG19-4 $\mu\text{m}$  Guard Column 2  $\times$  50mm) with a gradient of KOH as eluent, starting at 10 mM for 10 min, gradually increasing to 30 mM for 20 min, increasing to 100 mM for 0.1 min, staying at 100 mM for 6.9 min, decreasing to 10 mM for 0.1 min, and maintaining at 10 mM for the last 4.9 min. The total analyzing time was 30 min. The flow rate was 0.25 mL/min and the injection volume was 50  $\mu\text{L}$ . Retention times were 9.6 min for chloride and 7.9 min for bromate. LOQ were  $\sim$ 0.02  $\mu\text{M}$  for chloride and  $\sim$ 0.01  $\mu\text{M}$  for bromate.

#### Text S11. Ozonation experiment

Ozone stock solutions were prepared by sparging ozone-containing oxygen gas in ultrapure water cooled with ice. The ozone/oxygen gas mixture was produced by an ozone generator (BMT 803 BT, BMT Messtechnik, Berlin) fed with > 99.995% oxygen. Ozone concentrations in the stock solution were typically 1.6 – 1.8 mM determined by UV absorbance ( $\epsilon_{260\text{nm}} = 3200 \text{ M}^{-1} \text{ cm}^{-1}$ ).<sup>21</sup>

#### Text S12. Quantum chemical calculation methods

The aqueous-phase free energy of formation,  $G_{\text{aq}}$ , of all species was obtained based on equation S9:

$$G_{\text{aq}} = \Delta G_{\text{solv,calc}} + G_{\text{corr,gas}} + E_{0,\text{gas}} \quad \text{Eq. S9}$$

$\Delta G_{\text{solv,calc}}$  is the solvation free energy of the species calculated using an implicit solvation model (SMD)<sup>22</sup> in the absence or presence of explicit water molecules.  $G_{\text{corr,gas}}$  is the gaseous phase correction to the free energy of the species solvated by explicit water molecules if explicit water molecules are

present.  $E_{0,\text{gas}}$  is the electronic energy of the species solvated by explicit water molecules. The  $\Delta G_{\text{solv,calc}}$  and  $G_{\text{corr,gas}}$  values were calculated at the level of M06-2X/Aug-cc-pVDZ.<sup>23</sup> In particular, the  $\Delta G_{\text{solv,calc}}$  values were calculated following the procedure of a continuum solvation method.<sup>24</sup> The  $E_{0,\text{gas}}$  value was calculated at the level of M06-2X/Aug-cc-pVTZ.

### Text S13. Validation of quantum chemical calculation methods

Theoretically calculated  $\Delta G_{\text{solv,calc}}$  in the absence and presence of explicit water molecules ( $n=1-3$ ) of  $\text{Br}^{\bullet}$  and  $\text{Br}^{-}$  were validated with experimentally measured or derived values. In the validation process, we included other halogen radicals and halides (i.e., F, Cl and I). Table S4 summarizes the theoretically calculated  $\Delta G_{\text{solv,calc}}$  values and experimental values of halides and halogen radicals. The experimentally derived values of  $\Delta G_{\text{solv,calc}}$  for halogen radicals ( $\text{X}^{\bullet}$ , where X is Cl or Br) were determined by the equation below<sup>25</sup> where IE(gas) and IE(aq) are the adiabatic gaseous and aqueous-phase ionization energy of X, respectively.

$$\Delta G_{\text{solv,calc}}(\text{X}^{\bullet}) = -\text{IE}(\text{gas}) + \Delta G_{\text{solv,calc}}(\text{X}^{-}) + \text{IE}(\text{aq}) \quad \text{Eq. S10}$$

The use of the hybrid DFT method, M06-2X, by validating the experimental one electron reduction potential of  $\text{Br}^{\bullet}/\text{Br}^{-}$  by other quantum mechanical methods including CCSD(T)<sup>26</sup> and CBS-QB3<sup>27,28</sup> and MP2 as summarized in Table S5. In addition to the validation of the one electron reduction potential for  $\text{Br}^{\bullet}/\text{Br}^{-}$ , one the electron reduction potentials for benzene, toluene, and anisole are validated Table S6.

### Text S14. Calculation of free energy of activation by the Marcus theory

Based on the validation, we used the  $G_{\text{aq}}$  values obtained at the level of M06-2X/Aug-cc-pVDZ//M06-2X/Aug-cc-pVTZ with 3 explicit water molecules. We used Spartan 18 (Wavefunction, Irvine, CA)<sup>29</sup> to search the conformers of an adduct comprised of  $\text{Br}^{\bullet}$  and a target organic compound using a modified MMFF method.<sup>30</sup> The aqueous-phase free energy of adduct formation,  $\Delta G_{\text{aq,calc}}^{\text{adduct}}$ , was calculated as below:

$$\Delta G_{\text{aq,calc}}^{\text{adduct}} = G_{\text{adduct,aq}} - (G_{\text{R,aq}} + G_{\text{Br}^{\bullet},\text{aq}}) \quad \text{Eq. S11}$$

where  $G_{\text{adduct,aq}}$ ,  $G_{\text{R,aq}}$ , and  $G_{\text{Br}^{\bullet},\text{aq}}$  are the aqueous-phase free energies of formation of an adduct, of the target compound, R, and  $\text{Br}^{\bullet}$ , respectively.

The single electron transfer (SET) reaction of Br<sup>•</sup> with an organic compound is not a barrierless interior reaction. Thus, we used the Marcus theory<sup>31</sup> to calculate the aqueous phase free energy of activation,  $\Delta G_{\text{aq,SET}}^{\text{act}}$ , in equation as no bond cleavage is involved in the SET reaction of Br<sup>•</sup> (i.e., dissociative electron transfer).

$$\Delta G_{\text{aq,SET}}^{\text{act}} = (1 + \Delta G_{\text{aq,SET}}^{\text{react}})^2 / 4\lambda \quad \text{Eq. S12}$$

Where  $\Delta G_{\text{aq,SET}}^{\text{react}}$  is the standard state aqueous phase free energy of reaction, kcal/mol. The reorganization energy,  $\lambda$ , has two components: (1) the inner-sphere part that represents the change in the structure of solute and (2) the outer-sphere part that represents the change in the structure of the surrounding solvent. The  $\lambda_{\text{in}}$  values were calculated as:

$$\lambda_{\text{in}} = \Delta E_{\text{aq,SET}}^{\text{react}} - \Delta G_{\text{aq,SET}}^{\text{react}} \quad \text{Eq. S13}$$

$$\Delta E_{\text{aq,SET}}^{\text{react}} = \Delta E_{\text{aq,vertical}}^{\text{react}} - \Delta E_{\text{aq,reactants}}^{\text{react}} \quad \text{Eq. S14}$$

where  $\Delta E_{\text{aq,SET}}^{\text{react}}$  is the standard state aqueous phase reaction energy change between reactants and products,  $\Delta E_{\text{aq,vertical}}^{\text{react}}$  is the standard state energy change for vertical product and  $\Delta E_{\text{aq,reactants}}^{\text{react}}$  is the standard state energy of reactants. We calculated the  $\lambda_{\text{out}}$  values based on the two-sphere model in a continuum medium proposed by Marcus:<sup>31</sup>

$$\lambda_{\text{out}} = \Delta e^2 N_{\text{A}} \left( \frac{1}{2r_1} + \frac{1}{2r_2} - \frac{1}{R} \right) \left( \frac{1}{\epsilon_0} - \frac{1}{\epsilon_s} \right) \quad \text{Eq. S15}$$

where  $\Delta e$  is the amount of charge transferred,  $N_{\text{A}}$  is the Avogadro's number;  $r_1$  and  $r_2$  are the ionic radii of the reactant molecules 1 and 2, respectively, and  $R = r_1 + r_2$ ,  $\epsilon_0$  and  $\epsilon_s$  are the optic (i.e., 78.39) and static (i.e., 1.77) dielectric constants of water, respectively, at 25 °C. Upon the calculations of the chloramine and the reaction product, radical cation, we used the  $\lambda_{\text{out}}$  obtained by treating the first solvation sphere explicitly with three water molecules. This way, the term  $\lambda_{\text{in}}$  also accounted for the outer-sphere reorganization of the first sphere in going from Br<sup>•</sup> to Br<sup>-</sup>, since the solvation pattern is different in these two species.

The calculated results for the organic model compounds and NH<sub>2</sub>Cl are summarized in Table S8.

#### Text S15. LC-HRMS/MS evidences supporting the formation of C<sub>6</sub>H<sub>3</sub>BrO<sub>3</sub> and C<sub>6</sub>H<sub>5</sub>BrO<sub>3</sub> for the phenol-Br<sup>•</sup> reaction

Based on the LC-HRMS/MS analyses of the  $\gamma$ -radiolysis of phenol, two suspected products were detected containing Br (C<sub>6</sub>H<sub>3</sub>BrO<sub>3</sub> and C<sub>6</sub>H<sub>5</sub>BrO<sub>3</sub>) with masses of 200.9193 and 202.9349 as [M-H]<sup>-</sup>

corresponding to  $C_6H_3^{79}BrO_3$  and  $C_6H_5^{79}BrO_3$ , respectively, with mass deviation  $< 1$  ppm (Figure S11, Table S3). The presence of Br in the suggested molecular formulas was confirmed by the detection of the  $^{81}Br$  isotopes with similar peak height, corresponding to the natural abundance of the Br isotope of  $^{79}Br:^{81}Br = 1:0.97$ . Neither of them appeared in blank samples, but showed a gradual increase over time during  $\gamma$ -radiolysis experiments (Figure S12). Based on the molecular formula, *p*-benzoquinone substituted by a hydroxy group and a Br was suggested as a possible molecular structure for  $C_6H_3BrO_3$  (Scheme 1, main text). To confirm this, the substituted *p*-benzoquinone was synthesized by brominating 1,2,4-benzenetriol by *N*-bromosuccinimide and subsequently oxidizing the hydroxy groups by the Fétizon's reagent ( $Ag_2CO_3$  on celite) to a quinone group. The synthesized product was analyzed by the same LC-HRMS/MS method and its MS spectrum was compared to those obtained from the  $\gamma$ -radiolysis samples containing phenol. The same mass was observed in the synthesized chemical and in the  $\gamma$ -radiolysis sample, with a similar  $MS^2$  spectral pattern, but at a different retention time (difference of 4.1 min, Figure S13). This indicates that the synthesized chemical is likely an isomer of the suspected product formed during the  $\gamma$ -radiolysis. The masses corresponding to  $C_6H_3BrO_3$  and  $C_6H_5BrO_3$  were also detected in the  $\gamma$ -radiolysis sample containing *p*-benzoquinone (instead of phenol) as a starting compound, showing a similar formation trend (Figure S12). This additionally supports that  $C_6H_3BrO_3$  and  $C_6H_5BrO_3$  are likely to have a quinone structure.

#### Text S16. Formation pathway of 4-bromophenol from the phenol- $Br^\bullet$ reaction

A minor pathway of the reaction of phenol with  $Br^\bullet$  leads to the formation of 4-bromophenol with 4% yield (Scheme 1, main text). This implies a possible addition mechanism where a bromo-hydroxycyclohexadienyl radical formed by the addition of  $Br^\bullet$  to phenol is oxidized to a monobromophenol by any oxidant available in reaction solution, such as *p*-benzoquinone (Scheme S1(3)). This would be comparable to the formation of quinones from dihydroxycyclohexadienyl radicals observed for the oxidation of phenol by  $^\bullet OH$ .<sup>32</sup> Alternatively, 4-bromophenol can be also formed from  $PhO^\bullet$  by a radical-radical coupling of  $PhO^\bullet$  and  $Br^\bullet$ . The  $\Delta G_{aq}^{react}$  of  $PhO^\bullet$  with  $Br^\bullet$  for all possible resonance structures of  $PhO^\bullet$  (Figure S17) were calculated as -28.1 and -31.1 kcal/mol for the formation of 2-bromophenol and 4-bromophenol, respectively, and 6.3 kcal/mol of  $\Delta G_{aq}^{act}$ . The coupling reaction on both *ortho*- and *para*-positions of  $PhO^\bullet$  are similarly favorable according to the calculated  $\Delta G_{aq}^{react}$ , which however disagrees with the experimental result where only 4-bromophenol was detected. The dominance of the *para*-product is different from the reaction of phenol with HOBr, for which the *ortho*- and *para*-positions are similarly susceptible.<sup>33,34</sup> The distinction may come from the different nature of the  $PhO^\bullet$ - $Br^\bullet$  reaction

mechanism (radical-radical coupling) compared to phenol-HOBr (electrophilic aromatic substitution),<sup>33</sup> but more information is needed to clarify this.

#### Text S17. Principles of the chlorine-ammonia pretreatment as a bromate mitigation strategy of ozonation

The chlorine-ammonia pretreatment is a proven strategy to mitigate bromate during ozonation.<sup>21</sup> It was originally designed to pre-oxidize bromide to HOBr, which can then be quenched by addition of ammonium.<sup>35,36</sup> The formed monobromamine reacts moderately with ozone to bromide and nitrate.<sup>37</sup> Furthermore, the residual chlorine also reacts with ammonia to NH<sub>2</sub>Cl. NH<sub>2</sub>Cl has an additional benefit, because it also scavenges •OH ( $k_{\bullet\text{OH},\text{NH}_2\text{Cl}} = 5.2 \times 10^8 \text{ M}^{-1} \text{ s}^{-1}$  or  $5.7 \times 10^8 \text{ M}^{-1} \text{ s}^{-1}$ ).<sup>38,39</sup> Overall, the chlorine-ammonia process blocks the initial steps for bromate formation by: (1) masking bromide and preventing it from being oxidized to HOBr by ozone and to Br• by •OH (i.e., blocking reactions 1 and 2, main text) and (2) scavenging •OH.

#### Text S18. Calculation of the fractions of Br•-related reactions during ozonation

Ozone, DOM, and Br<sup>-</sup> are considered the main Br• consumers during ozonation. They produce bromine monoxide (BrO•, a transient species in bromate formation during ozonation),<sup>10</sup> DOM oxidation products (e.g., quinones (section 3.2 in the main text), and Br<sub>2</sub>•<sup>-</sup>, respectively, as a result of the reaction with Br•. In addition, a Br•-specific quencher such as NH<sub>2</sub>Cl tested in this study consumes Br• as well. The fraction of Br• reacting with each consumer (e.g., f(Br•+NH<sub>2</sub>Cl) for the fraction reacting with NH<sub>2</sub>Cl) was calculated (Eqs. S16 – S18). The calculated f(Br•+X) as a function of varying conditions are shown in Figure 3 (main text) and in Figures S18 and S19.

$$-\frac{d[\text{Br}^\bullet]}{dt} = k_{\text{Br}^\bullet, \text{O}_3} [\text{Br}^\bullet][\text{O}_3] + k_{\text{Br}^\bullet, \text{DOM}} [\text{Br}^\bullet][\text{DOM}] + k_{\text{Br}^\bullet, \text{Br}^-} [\text{Br}^\bullet][\text{Br}^-] + k_{\text{Br}^\bullet, \text{NH}_2\text{Cl}} [\text{Br}^\bullet][\text{NH}_2\text{Cl}] \quad \text{Eq. S16}$$

$$-\frac{d[\text{Br}^\bullet]}{[\text{Br}^\bullet]} = (k_{\text{Br}^\bullet, \text{O}_3} [\text{O}_3] + k_{\text{Br}^\bullet, \text{DOM}} [\text{DOM}] + k_{\text{Br}^\bullet, \text{Br}^-} [\text{Br}^-] + k_{\text{Br}^\bullet, \text{NH}_2\text{Cl}} [\text{NH}_2\text{Cl}]) dt \quad \text{Eq. S17}$$

$$f(\text{Br}^\bullet + \text{NH}_2\text{Cl}) = \frac{k_{\text{Br}^\bullet, \text{NH}_2\text{Cl}} [\text{NH}_2\text{Cl}]}{(k_{\text{Br}^\bullet, \text{O}_3} [\text{O}_3] + k_{\text{Br}^\bullet, \text{DOM}} [\text{DOM}] + k_{\text{Br}^\bullet, \text{Br}^-} [\text{Br}^-] + k_{\text{Br}^\bullet, \text{NH}_2\text{Cl}} [\text{NH}_2\text{Cl}])} \quad \text{Eq. S18}$$

The selected  $k_{\text{Br}^\bullet}$  for the f(Br•+X) calculation were  $1.5 \times 10^8 \text{ M}^{-1} \text{ s}^{-1}$  for ozone,<sup>10</sup>  $1.7 \times 10^4 (\text{mgC/L})^{-1} \text{ s}^{-1}$  for DOM (Table 1, main text),  $4.2 \times 10^7 \text{ M}^{-1} \text{ s}^{-1}$  for Br<sup>-</sup> (see below), and  $4.4 \times 10^9 \text{ M}^{-1} \text{ s}^{-1}$  for NH<sub>2</sub>Cl (Table 1, main text). The  $k_{\text{Br}^\bullet}$  of  $4.2 \times 10^7 \text{ M}^{-1} \text{ s}^{-1}$  for Br<sup>-</sup> is an apparent  $k_{\text{Br}^\bullet}$  calculated by taking into account the



reverse reaction of  $\text{Br}^\bullet$  and  $\text{Br}^-$  (Eq. S19) and a subsequent reaction of  $\text{Br}_2^{\bullet-}$  with DOM (Eq. S20) for  $[\text{DOM}] = 1.4 \text{ mgC/L}$ . Details on deriving the apparent  $k_{\text{Br}^\bullet}$  are shown below.

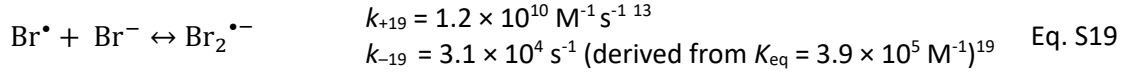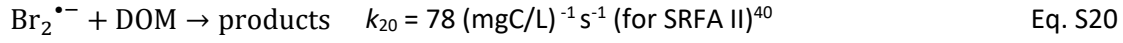

According to the Eqs. S19 and S20, the rate expression for  $\text{Br}^\bullet$  and  $\text{Br}_2^{\bullet-}$  are as follows:

$$-\frac{d[\text{Br}^\bullet]}{dt} = k_{+19}[\text{Br}^\bullet][\text{Br}^-] - k_{-19}[\text{Br}_2^{\bullet-}] \quad \text{Eq. S21}$$

$$-\frac{d[\text{Br}_2^{\bullet-}]}{dt} = k_{20}[\text{Br}_2^{\bullet-}][\text{DOM}] + k_{-19}[\text{Br}_2^{\bullet-}] - k_{+19}[\text{Br}^\bullet][\text{Br}^-] \quad \text{Eq. S22}$$

Assuming  $\text{Br}_2^{\bullet-}$  is in steady-state, Eq. S22 can be expressed in terms of the concentration of  $\text{Br}_2^{\bullet-}$ :

$$[\text{Br}_2^{\bullet-}]_{ss} = \frac{k_{+19}[\text{Br}^\bullet][\text{Br}^-]}{(k_{20}[\text{DOM}] + k_{-19})} \quad \text{Eq. S23}$$

By substituting Eq. S21 with Eq. S23, the rate expression for  $\text{Br}^\bullet$  is converted to Eq. S24 and finally  $k_{\text{app}}$  is obtained as a value dependent on DOM concentration (e.g.,  $k_{\text{app}} = 4.2 \times 10^7 \text{ M}^{-1} \text{ s}^{-1}$  for  $1.4 \text{ mgC/L}$  DOM).

$$-\frac{d[\text{Br}^\bullet]}{dt} = \frac{k_{+19}k_{20}[\text{DOM}]}{(k_{20}[\text{DOM}] + k_{-19})} [\text{Br}^\bullet][\text{Br}^-] = k_{\text{app}}[\text{Br}^\bullet][\text{Br}^-] \quad \text{Eq. S24}$$

Table S1. Chemical reagents

| Compound                                                                      | Supplier       | Catalog no. | Purity                                |
|-------------------------------------------------------------------------------|----------------|-------------|---------------------------------------|
| 1,2-Dibromoethane                                                             | Sigma-Aldrich  | 240656      | ≥ 99%                                 |
| 2,2'-Azino-bis(3-ethylbenzothiazoline-6-sulfonic acid) diammonium salt (ABTS) | Sigma-Aldrich  | 10102946001 | > 98%                                 |
| 3-Phenylpropionic acid                                                        | Alfa Aesar     | A14908      | 99%                                   |
| 4-Chlorobenzoic acid                                                          | Sigma-Aldrich  | 135585      | 99%                                   |
| 4-Bromophenol                                                                 | Fluk           | 18010       | ≥ 98%                                 |
| 4-chlorophenol                                                                | Riedel-de Haën | 35826       | 99.8%                                 |
| 4-iodophenol                                                                  | Fluka          | 58020       | ≥ 98%                                 |
| Ammonium sulfate                                                              | Sigma-Aldrich  | A5132       | ≥ 99%                                 |
| Anisole                                                                       | Sigma-Aldrich  | 123226      | 99%                                   |
| Benzene                                                                       | Sigma-Aldrich  | 32212       | ≥ 99%                                 |
| Benzoic acid                                                                  | Sigma-Aldrich  | 33047       | ≥ 99%                                 |
| <i>p</i> -Benzoquinone                                                        | Sigma-Aldrich  | B10358      | ≥ 98%                                 |
| Benzylamine                                                                   | Sigma-Aldrich  | 185701      | 99%                                   |
| <i>N,N</i> -Dimethylbenzylamine                                               | Sigma-Aldrich  | 185582      | ≥ 99%                                 |
| Formic acid                                                                   | Sigma-Aldrich  | 1.00264     | 90-100%                               |
| Ibuprofen                                                                     | Sigma-Aldrich  | I1892       | ≥ 98%                                 |
| Naphthalene                                                                   | Fluka          | 70211       | ≥ 99%                                 |
| Phenol                                                                        | Fluka          | 77610       | ≥ 99%                                 |
| Sorbic acid                                                                   | Fluka          | 85510       | ≥ 99%                                 |
| Toluene                                                                       | Merck          | 1.08325     | ≥ 99%                                 |
| <i>trans</i> -cinnamic acid                                                   | Sigma-Aldrich  | C80857      | ≥ 99%                                 |
| <i>tert</i> -butanol                                                          | Sigma-Aldrich  | 19460       | ≥ 99%                                 |
| Sodium hypochlorite solution                                                  | Sigma-Aldrich  | 13440       | 6-14% active chlorine                 |
| Suwannee River Humic Acid Standard II                                         | IHSS           | 2S101F      | 52.34% carbon as dry, ash-free sample |
| Silver nitrate                                                                | Merck          | 1512        | ≥ 99%                                 |
| Hydroquinone                                                                  | Sigma-Aldrich  | H9003       | ≥ 99%                                 |
| Catechol                                                                      | Merck          | 82261       | ≥ 99%                                 |

Table S2. Compounds analyzed by HPLC and LC-HRMS/MS and the corresponding analytical condition and LOQ.

| Compounds                       | Column | Detection <sup>1</sup> | RT, min                 | LOQ, $\mu\text{M}$ | Measuring range          |
|---------------------------------|--------|------------------------|-------------------------|--------------------|--------------------------|
| Benzylamine                     | HILIC  | 200nm (Em) /270nm (Ex) | 6.9                     | 1.2                | 2 – 3 $\mu\text{M}$      |
| <i>N,N</i> -Dimethylbenzylamine | HILIC  | 200nm (Em) /270nm (Ex) | 8.0                     | 0.6                | 2 – 3 $\mu\text{M}$      |
| 4-Bromophenol                   | C18    | 220nm or MS            | 10.4 (UV),<br>18.5 (MS) | 0.3 (MS)           | 1 – 3 $\mu\text{M}$      |
| 4-Chlorophenol                  | C18    | 220nm                  | 9.3                     | 0.6                | 0.6 – 3 $\mu\text{M}$    |
| 4-Iodophenol                    | C18    | 220nm                  | 11.8                    | 0.6                | 0.7 – 3 $\mu\text{M}$    |
| Anisole                         | C18    | 267nm                  | 10.5                    | 0.3                | 1 – 3 $\mu\text{M}$      |
| Benzene                         | C18    | 200nm (Em) /270nm (Ex) | 11.0                    | 2.5                | 3 – 4 $\mu\text{M}$      |
| Benzoic acid                    | C18    | 230nm                  | 6.7                     | 0.3                | 2 – 3 $\mu\text{M}$      |
| <i>p</i> -Chlorobenzoic acid    | C18    | 230nm                  | 11.5                    | 0.6                | 2 – 3 $\mu\text{M}$      |
| Ibuprofen                       | C18    | 220nm                  | 18.1                    | 0.2                | 0.3 – 4 $\mu\text{M}$    |
| Naphthalene                     | C18    | 220nm                  | 16.9                    | 0.2                | 0.2 – 2 $\mu\text{M}$    |
| Phenol                          | C18    | 200nm (Em) /310nm (Ex) | 5.1                     | 0.2                | 2 – 3 $\mu\text{M}$      |
| Toluene                         | C18    | 210nm                  | 14.5                    | 1.5                | 2 – 3 $\mu\text{M}$      |
| 3-Phenylpropionic acid          | C18    | 210nm                  | 7.8                     | 0.3                | 2 – 3 $\mu\text{M}$      |
| <i>p</i> -Benzoquinone          | C18    | 254nm                  | 3.0                     | 0.6                | 0.8 – 4 $\mu\text{M}$    |
| Sorbic acid                     | C18    | 267nm                  | 6.6                     | 0.2                | 0.3 – 3 $\mu\text{M}$    |
| <i>trans</i> -Cinnamic acid     | C18    | 267nm                  | 9.3                     | 0.1                | 1 – 3 $\mu\text{M}$      |
| Hydroquinone                    | C18    | 220nm                  | 5.6                     | 0.6                | 0.1 – 0.6 $\mu\text{M}$  |
| Catechol                        | C18    | MS                     | 8.4                     | 0.02               | 0.02 – 0.1 $\mu\text{M}$ |

<sup>1</sup>Diode-array detector, fluorescence detector, or mass spectrometer

Table S3. Detected exact masses and mass deviation by LC-HRMS/MS.

| Compounds                                                  | Molecular formula (M)                                        | Polarity, Adduct | Theoretical exact mass | Detected mass | Mass deviation, ppm |
|------------------------------------------------------------|--------------------------------------------------------------|------------------|------------------------|---------------|---------------------|
| Phenol                                                     | C <sub>6</sub> H <sub>6</sub> O                              | pos, M+H         | 95.0491                | 95.0491       | 0.0                 |
| <i>p</i> -Benzoquinone                                     | C <sub>6</sub> H <sub>4</sub> O <sub>2</sub>                 | pos, M+H         | 109.0284               | 109.0285      | 0.9                 |
| 4-Bromophenol                                              | C <sub>6</sub> H <sub>5</sub> <sup>79</sup> BrO              | neg, M-H         | 170.9451               | 170.9454      | 1.8                 |
|                                                            | C <sub>6</sub> H <sub>5</sub> <sup>81</sup> BrO              |                  | 172.9431               | 172.9429      | 1.2                 |
| Catechol                                                   | C <sub>6</sub> H <sub>6</sub> O <sub>2</sub>                 | neg, M-H         | 109.0295               | 109.0299      | 3.7                 |
| C <sub>6</sub> H <sub>3</sub> BrO <sub>3</sub> (suspected) | C <sub>6</sub> H <sub>3</sub> <sup>79</sup> BrO <sub>3</sub> | neg, M-H         | 200.9193               | 200.9194      | 0.5                 |
|                                                            | C <sub>6</sub> H <sub>3</sub> <sup>81</sup> BrO <sub>3</sub> |                  | 202.9172               | 202.9174      | 1.0                 |
| C <sub>6</sub> H <sub>5</sub> BrO <sub>3</sub> (suspected) | C <sub>6</sub> H <sub>5</sub> <sup>79</sup> BrO <sub>3</sub> | neg, M-H         | 202.9349               | 202.9352      | 1.5                 |
|                                                            | C <sub>6</sub> H <sub>5</sub> <sup>81</sup> BrO <sub>3</sub> |                  | 204.9329               | 204.9328      | 0.5                 |
| C <sub>6</sub> H <sub>4</sub> O <sub>3</sub> (suspected)   | C <sub>6</sub> H <sub>4</sub> O <sub>3</sub>                 | neg, M-H         | 123.0088               | 123.0090      | 1.6                 |
| C <sub>6</sub> H <sub>6</sub> O <sub>3</sub> (suspected)   | C <sub>6</sub> H <sub>6</sub> O <sub>3</sub>                 | neg, M-H         | 125.0244               | 125.0246      | 1.6                 |
| C <sub>6</sub> H <sub>6</sub> O <sub>4</sub> (suspected)   | C <sub>6</sub> H <sub>6</sub> O <sub>4</sub>                 | neg, M-H         | 141.0193               | 141.0196      | 2.1                 |

|                                                            |                                                |          |          |          |     |
|------------------------------------------------------------|------------------------------------------------|----------|----------|----------|-----|
| C <sub>12</sub> H <sub>10</sub> O <sub>2</sub> (suspected) | C <sub>12</sub> H <sub>10</sub> O <sub>2</sub> | neg, M-H | 185.0608 | 185.0609 | 0.5 |
|------------------------------------------------------------|------------------------------------------------|----------|----------|----------|-----|

Table S4. Theoretically calculated  $\Delta G_{\text{solv,calc}}$  values and experimental values of halides and halogen radicals in kcal/mol. n is the number of explicit water molecule(s).

| X <sup>-</sup> or X <sup>•</sup> | $\Delta G_{\text{solv,calc}}$<br>(n=0) | $\Delta G_{\text{solv,calc}}$<br>(n=1) | $\Delta G_{\text{solv,calc}}$<br>(n=2) | $\Delta G_{\text{solv,calc}}$<br>(n=3) | $\Delta G_{\text{solv,exp}}$ |
|----------------------------------|----------------------------------------|----------------------------------------|----------------------------------------|----------------------------------------|------------------------------|
| F <sup>-</sup>                   | -86.9                                  | -96.0                                  | -99.2                                  | -104.6                                 | -104.3 <sup>41</sup>         |
| Cl <sup>-</sup>                  | -65.1                                  | -69.1                                  | -69.3                                  | -71.0                                  | -75.5 <sup>25</sup>          |
| Br <sup>-</sup>                  | -53.3                                  | -58.7                                  | -60.1                                  | -63.0                                  | -66.3 <sup>42</sup>          |
| I <sup>-</sup>                   | -64.1                                  | -66.8                                  | -66.0                                  | -67.7                                  | -57.4 <sup>42</sup>          |
| Cl <sup>•</sup>                  | 0.1                                    | -4.0                                   | -3.7                                   | -4.3                                   | -4.3 <sup>a</sup>            |
| Br <sup>•</sup>                  | -0.8                                   | -3.4                                   | -1.1                                   | -1.4                                   | 0.11 <sup>a</sup>            |

<sup>a</sup> experimentally derived value in Eq. S10.

Table S5. Benchmark calculations of one electron reduction potential of Br<sup>•</sup>/Br<sup>-</sup>.

| Method and basis set                                                 | $E_{\text{red}}^0$ , V |
|----------------------------------------------------------------------|------------------------|
| UCCSD(T)/Aug-cc-pVTZ                                                 | 1.4                    |
| UCCSD(T)/Aug-cc-pVQZ                                                 | 1.5                    |
| UCCSD(T)/Aug-cc-pV5Z                                                 | 1.5                    |
| UCCSD(T)/Aug-cc-pVTZ                                                 | 1.4                    |
| CBS-QB3//M06-2X/Aug-cc-pVDZ                                          | 1.5                    |
| MP2(FULL)/Aug-cc-pVDZ//M06-2X/Aug-cc-pVTZ                            | 1.4                    |
| M06-2X/Aug-cc-pVDZ// M06-2X/Aug-cc-pVTZ (2 explicit water molecules) | 1.7                    |
| M06-2X/Aug-cc-pVDZ// M06-2X/Aug-cc-pVTZ (3 explicit water molecules) | 1.8                    |
| Experimental value <sup>43</sup>                                     | 1.8–2.2                |

Table S6. Validation of one electron reduction potential for selected organic compounds at the M06-2X/Aug-cc-pVDZ//M06-2X/Aug-cc-pVTZ level of theory with the SMD solvation model

| R/R <sup>•+</sup>                                                                                            | $E_{\text{red}}^0$ , V | Reference                         | $\Delta G_{\text{react,exp}}$ ,<br>kcal/mol | $\Delta G_{\text{react,calc}}$ ,<br>kcal/mol |
|--------------------------------------------------------------------------------------------------------------|------------------------|-----------------------------------|---------------------------------------------|----------------------------------------------|
| C <sub>6</sub> H <sub>6</sub> / C <sub>6</sub> H <sub>6</sub> <sup>•+</sup>                                  | -2.1                   | Pearson 1986 <sup>44</sup>        | 48.4                                        | 56.9                                         |
| C <sub>6</sub> H <sub>5</sub> CH <sub>3</sub> /C <sub>6</sub> H <sub>5</sub> CH <sub>3</sub> <sup>•+</sup>   | -1.98                  | Pearson 1986 <sup>44</sup>        | 45.7                                        | 49.1                                         |
| C <sub>6</sub> H <sub>5</sub> OCH <sub>3</sub> /C <sub>6</sub> H <sub>5</sub> OCH <sub>3</sub> <sup>•+</sup> | -1.62                  | Jonsson et al. 1993 <sup>45</sup> | 37.4                                        | 41.0                                         |

Table S7. Calculated free energy of adduct formation ( $\Delta G^{\text{adduct}}_{\text{aq}}$ ) for the reactions of organic model compounds with  $\text{Br}^{\bullet}$  (red sphere) and the optimized molecular structures of the adducts.

| No. | Compound                        | Optimized molecular structure of an adduct                                          | $\Delta G^{\text{adduct}}_{\text{aq}}$ , kcal/mol |
|-----|---------------------------------|-------------------------------------------------------------------------------------|---------------------------------------------------|
| 1   | Benzylamine                     | 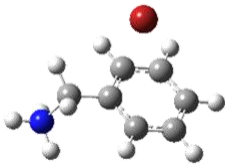   | -0.4                                              |
| 2   | <i>N,N</i> -Dimethylbenzylamine |    | -0.4                                              |
| 3   | <i>N</i> -Methylbenzylamine     |    | -0.3                                              |
| 4   | 4-Bromophenol                   |   | -0.8                                              |
| 5   | 4-Iodophenol                    |  | -1.4                                              |
| 6   | Anisole                         |  | -2.5                                              |
| 7   | Benzene                         |  | 4.5                                               |

|    |                             |                                                                                     |       |
|----|-----------------------------|-------------------------------------------------------------------------------------|-------|
| 8  | Benzoate                    | 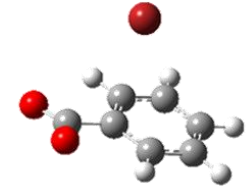   | -0.6  |
| 9  | Naphthalene                 |    | -0.6  |
| 10 | Toluene                     |    | -1.4  |
| 11 | Sorbic acid                 |    | -9.9  |
| 12 | <i>trans</i> -Cinnamic acid |   | -1.3  |
| 13 | Ibuprofen                   |  | -1.6  |
| 14 | Phenol                      |  | -1.9  |
| 15 | Phenolate                   |  | -19.8 |

|    |                                                |                                                                                     |       |
|----|------------------------------------------------|-------------------------------------------------------------------------------------|-------|
| 16 | 4-Chlorophenol                                 | 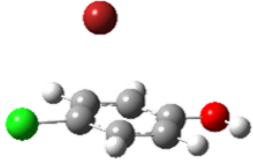   | -0.7  |
| 17 | 4-Chlorophenolate                              |    | -18.6 |
| 18 | Benzylamine (deprotonated)                     |    | -8.4  |
| 19 | <i>N,N</i> -Dimethylbenzylamine (deprotonated) |    | -12.2 |
| 20 | <i>N</i> -Methylbenzylamine (deprotonated)     |  | -10.8 |
| 21 | 4-Bromophenolate                               |  | -17.8 |
| 22 | <i>p</i> -Chlorobenzoate                       |  | -0.6  |
| 23 | 3-Phenylpropionic acid                         |  | -1.2  |

|    |                        |                                                                                                                                                                                                                                                                                                                                                                                                                                                                                                                                      |     |
|----|------------------------|--------------------------------------------------------------------------------------------------------------------------------------------------------------------------------------------------------------------------------------------------------------------------------------------------------------------------------------------------------------------------------------------------------------------------------------------------------------------------------------------------------------------------------------|-----|
| 24 | <i>p</i> -Benzoquinone | 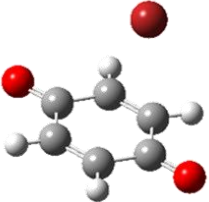 A ball-and-stick model of p-benzoquinone. The molecule consists of a six-membered ring of carbon atoms (grey spheres) with two oxygen atoms (red spheres) attached to the ring at the para position. Each oxygen atom is double-bonded to a carbon atom in the ring. The ring is shown in a perspective view, with hydrogen atoms (white spheres) attached to the carbon atoms. The oxygen atoms are positioned at the top and bottom of the ring. | 1.2 |
|----|------------------------|--------------------------------------------------------------------------------------------------------------------------------------------------------------------------------------------------------------------------------------------------------------------------------------------------------------------------------------------------------------------------------------------------------------------------------------------------------------------------------------------------------------------------------------|-----|



Table S8. Compiled QC calculation results for the reactions of the selected organic model compounds and of  $\text{NH}_2\text{Cl}$  with  $\text{Br}^-$  ( $\Delta G^{\text{react}}_{\text{aq,calc}}$  as the standard state aqueous phase free energy of reaction,  $\lambda$  as the reorganization energy, and  $\Delta G^{\text{act}}_{\text{aq,SET}}$  as the aqueous phase free energy of activation).

| No. | Name                                        | Structure | $\Delta G^{\text{react}}_{\text{aq,calc}}$<br>kcal/mol | $\lambda$ ,<br>kcal/mol | $\Delta G^{\text{act}}_{\text{aq,SET}}$<br>kcal/mol |
|-----|---------------------------------------------|-----------|--------------------------------------------------------|-------------------------|-----------------------------------------------------|
| 1   | Benzylamine<br>(protonated)                 |           | 20.2                                                   | 26.4                    | 20.5                                                |
| 2   | N,N-<br>dimethylbenzylamine<br>(protonated) |           | 19.8                                                   | 27.1                    | 20.3                                                |
| 3   | N-methylbenzylamine<br>(protonated)         |           | 18.4                                                   | 28.4                    | 19.3                                                |
| 4   | 3,4-Chlorophenol                            |           | 5.2                                                    | 28.5                    | 10.0                                                |
| 5   | 4-bromophenol                               |           | 2.8                                                    | 28.4                    | 8.6                                                 |
| 6   | 4-iodophenol                                |           | -3.4                                                   | 27.3                    | 5.3                                                 |
| 7   | Anisole                                     |           | -0.5                                                   | 28.0                    | 6.7                                                 |
| 8   | Benzene                                     |           | 15.4                                                   | 26.3                    | 16.5                                                |
| 9   | Benzoate                                    |           | 8.8                                                    | 34.9                    | 13.7                                                |
| 10  | Naphthalene                                 |           | -1.4                                                   | 25.5                    | 5.7                                                 |
| 11  | Toluene                                     |           | 7.6                                                    | 26.9                    | 11.1                                                |
| 12  | Sorbic acid                                 |           | -5.7                                                   | 30.3                    | 5.0                                                 |
| 13  | Trans-cinnamic acid                         |           | 0.5                                                    | 29.3                    | 7.6                                                 |
| 14  | Ibuprofen                                   |           | -23.9                                                  | 63.7                    | 6.2                                                 |

|    |                                        |                                                                                     |       |      |      |
|----|----------------------------------------|-------------------------------------------------------------------------------------|-------|------|------|
| 15 | Phenol                                 |    | 0.9   | 28.0 | 7.5  |
| 16 | Phenolate                              |    | -30.5 | 25.2 | 0.3  |
| 17 | 4-chlorophenol                         |    | 1.5   | 28.5 | 7.9  |
| 18 | 4-chlorophenolate                      |    | -29.4 | 25.6 | 0.1  |
| 19 | Benzylamine (deprotonated)             |    | -1.9  | 36.0 | 8.1  |
| 20 | N,N-dimethylbenzylamine (deprotonated) |    | -17.9 | 40.0 | 3.1  |
| 21 | N-methylbenzylamine (deprotonated)     |   | -10.4 | 36.3 | 4.6  |
| 22 | 4-bromophenolate                       |  | -28.5 | 25.9 | 0.1  |
| 23 | p-chlorobenzoate                       |  | 12.5  | 29.3 | 14.9 |
| 24 | 3-phenyl-propionate                    |  | 4.5   | 37.8 | 11.8 |
| 25 | p-benzoquinone                         |  | 39.8  | 27.3 | 41.2 |
| 26 | monochloramine                         | NH <sub>2</sub> Cl                                                                  | -34.0 | 65.5 | 3.8  |

Table S9. Spin density distribution of protonated and deprotonated forms of benzylamine and *N,N*-dimethylbenzylamine.

| Perspective | Benzylamine (protonated)                     | Benzylamine (deprotonated)                     |
|-------------|----------------------------------------------|------------------------------------------------|
| A           |                                              |                                                |
| B           |                                              |                                                |
| Perspective | <i>N,N</i> -Dimethylbenzylamine (protonated) | <i>N,N</i> -dimethylbenzylamine (deprotonated) |
| A           |                                              |                                                |
| B           |                                              |                                                |

Table S10. Scavenging rates ( $k_{\text{species}}'$ ,  $\text{s}^{-1}$ ) of  $e^-$ ,  $\cdot\text{OH}$ ,  $\cdot\text{H}$ ,  $\text{Br}\cdot$ , and  $\cdot\text{tBA}$  (*t*-butanol derived radical) by the reaction species in  $\gamma$ -radiolysis kinetic experiments (1,2-dibromoethane (1,2-DBE),  $\text{Ag}^+$ , *t*-butanol, a model compound, phosphate ions ( $\text{H}_2\text{PO}_4^-/\text{HPO}_4^{2-}$  for pH 7), and dissolved  $\text{O}_2$ ), based on the reported or assumed second-order rate constants ( $k_{\text{species}}$ ,  $\text{M}^{-1}\text{s}^{-1}$ ) and the applied concentrations (conc., M).

| species            | conc.                | $k_{e^-}$                          | $k_{e^-}'$        | $k_{\cdot\text{OH}}$               | $k_{\cdot\text{OH}}'$ | $k_{\cdot\text{H}}$                | $k_{\cdot\text{H}}'$ | $k_{\text{Br}\cdot}$              | $k_{\text{Br}\cdot}'$ | $k_{\cdot\text{tBA}}$          | $k_{\cdot\text{tBA}}'$ |
|--------------------|----------------------|------------------------------------|-------------------|------------------------------------|-----------------------|------------------------------------|----------------------|-----------------------------------|-----------------------|--------------------------------|------------------------|
| 1,2-DBE            | $7.0 \times 10^{-4}$ | $1.4 \times 10^{10}$ <sup>12</sup> | $9.8 \times 10^6$ | $2.4 \times 10^8$ <sup>12</sup>    | $1.7 \times 10^5$     | $1.0 \times 10^9$ <sup>b</sup>     | $7.0 \times 10^5$    | $1.0 \times 10^6$ <sup>46</sup>   | $7.0 \times 10^2$     | na                             | na                     |
| $\text{Ag}^+$      | $2.2 \times 10^{-6}$ | $3.7 \times 10^{10}$ <sup>47</sup> | $8.0 \times 10^4$ | $1.4 \times 10^{10}$ <sup>47</sup> | $3.0 \times 10^4$     | $2.0 \times 10^{10}$ <sup>47</sup> | $4.4 \times 10^4$    | $1.0 \times 10^{10}$ <sup>b</sup> | $2.2 \times 10^4$     | $1.0 \times 10^9$ <sup>b</sup> | $2.2 \times 10^3$      |
| <i>t</i> -butanol  | $4.0 \times 10^{-3}$ | $4.0 \times 10^5$ <sup>47</sup>    | $1.6 \times 10^3$ | $6.0 \times 10^8$ <sup>47</sup>    | $2.4 \times 10^6$     | $1.7 \times 10^5$ <sup>47</sup>    | $6.8 \times 10^2$    | $3.0 \times 10^4$ <sup>c</sup>    | $1.2 \times 10^2$     | na                             | na                     |
| model <sup>a</sup> | $3.4 \times 10^{-6}$ | $5.1 \times 10^9$ <sup>47</sup>    | $1.7 \times 10^4$ | $5.0 \times 10^9$ <sup>47</sup>    | $1.7 \times 10^4$     | $3.4 \times 10^9$ <sup>47</sup>    | $1.2 \times 10^4$    | $5.5 \times 10^9$ <sup>d</sup>    | $1.9 \times 10^4$     | $1.0 \times 10^9$ <sup>e</sup> | $3.4 \times 10^3$      |
| phosphate          | $5.0 \times 10^{-2}$ | $9.6 \times 10^6$ <sup>47</sup>    | $4.8 \times 10^5$ | $8.5 \times 10^4$ <sup>47</sup>    | $4.3 \times 10^3$     | $2.8 \times 10^5$ <sup>47</sup>    | $1.4 \times 10^4$    | na                                | na                    | na                             | Na                     |
| $\text{O}_2$       | $6.8 \times 10^{-5}$ | $1.9 \times 10^{10}$ <sup>47</sup> | $1.3 \times 10^6$ | na                                 | na                    | na                                 | na                   | na                                | na                    | $1.0 \times 10^9$ <sup>b</sup> | $6.8 \times 10^4$      |
| total <sup>f</sup> |                      |                                    | $1.2 \times 10^7$ |                                    | $2.6 \times 10^6$     |                                    | $7.7 \times 10^5$    |                                   | $4.1 \times 10^4$     |                                | $6.8 \times 10^4$      |

<sup>a</sup> naphthalene as an example; <sup>b</sup> assumed; <sup>c</sup> average value of <sup>13</sup> and <sup>14</sup>; <sup>d</sup> Table 1 (main text); <sup>e</sup> assumed based on the reaction of  $\cdot\text{tBA}$  with histidine<sup>17</sup>; <sup>f</sup> total calculated scavenging rate as a sum of the scavenging rates of all species

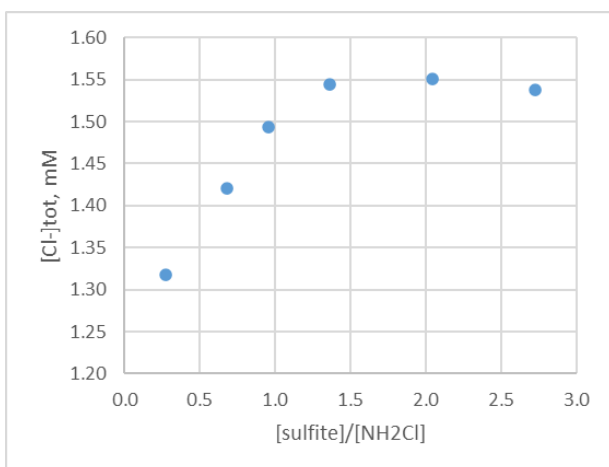

Figure S1. Total chloride concentrations ( $[\text{Cl}^-]_{\text{tot}}$ ) of primary  $\text{NH}_2\text{Cl}$  stock solutions after reducing  $\text{NH}_2\text{Cl}$  by sulfite.  $[\text{Cl}^-]_{\text{tot}}$  indicates the sum of the chloride concentration already present in the stock solution and chloride formed from the reduction of  $\text{NH}_2\text{Cl}$  with sulfite. The  $\text{NH}_2\text{Cl}$  concentration of the stock solution was 0.38 mM.

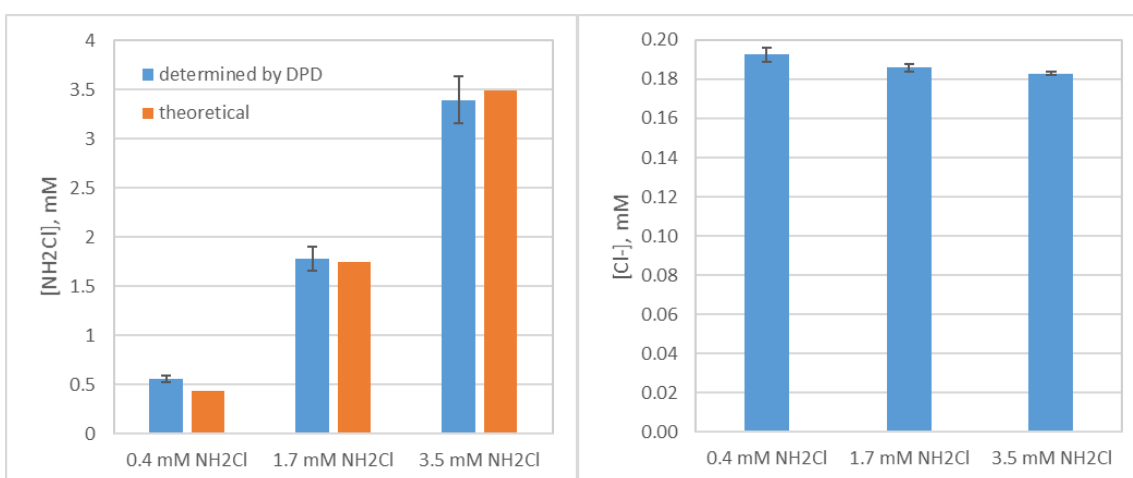

Figure S2. Left: Determined and theoretical  $\text{NH}_2\text{Cl}$  concentrations in supernatant of the silver(I)-treated  $\text{NH}_2\text{Cl}$  stock solutions (as 0.4mM, 1.7mM and 3.5mM  $\text{NH}_2\text{Cl}$ ); right: measured chloride concentrations in 0.2 mM  $\text{NH}_2\text{Cl}$  solutions prepared by diluting 0.4, 1.7, or 3.5 mM  $\text{NH}_2\text{Cl}$  stock solutions and reducing  $\text{NH}_2\text{Cl}$  of each solution by sulfite.

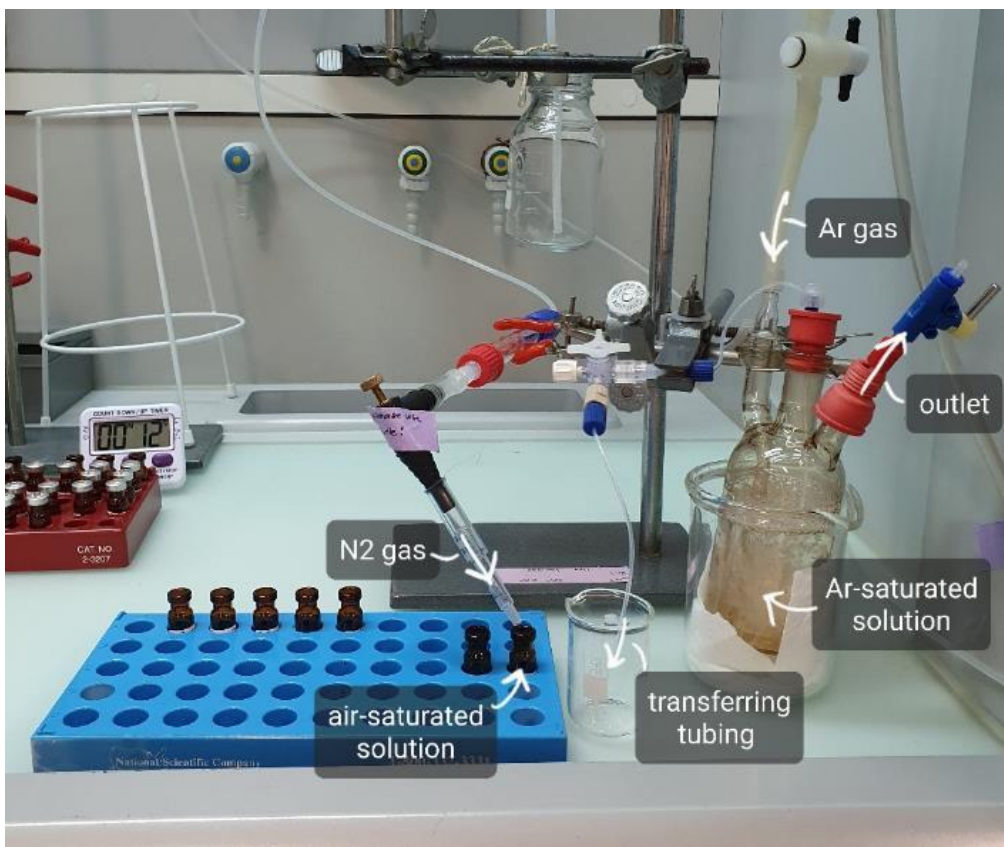

Figure S3. Setup for preparing  $\gamma$ -radiolysis samples for the competition kinetics experiments. To transfer the Ar-saturated solution to the sample vials containing an air-saturated solution (shown as 1.5mL amber vials with crimp neck), the transferring tubing was placed to the bottom of the vials.

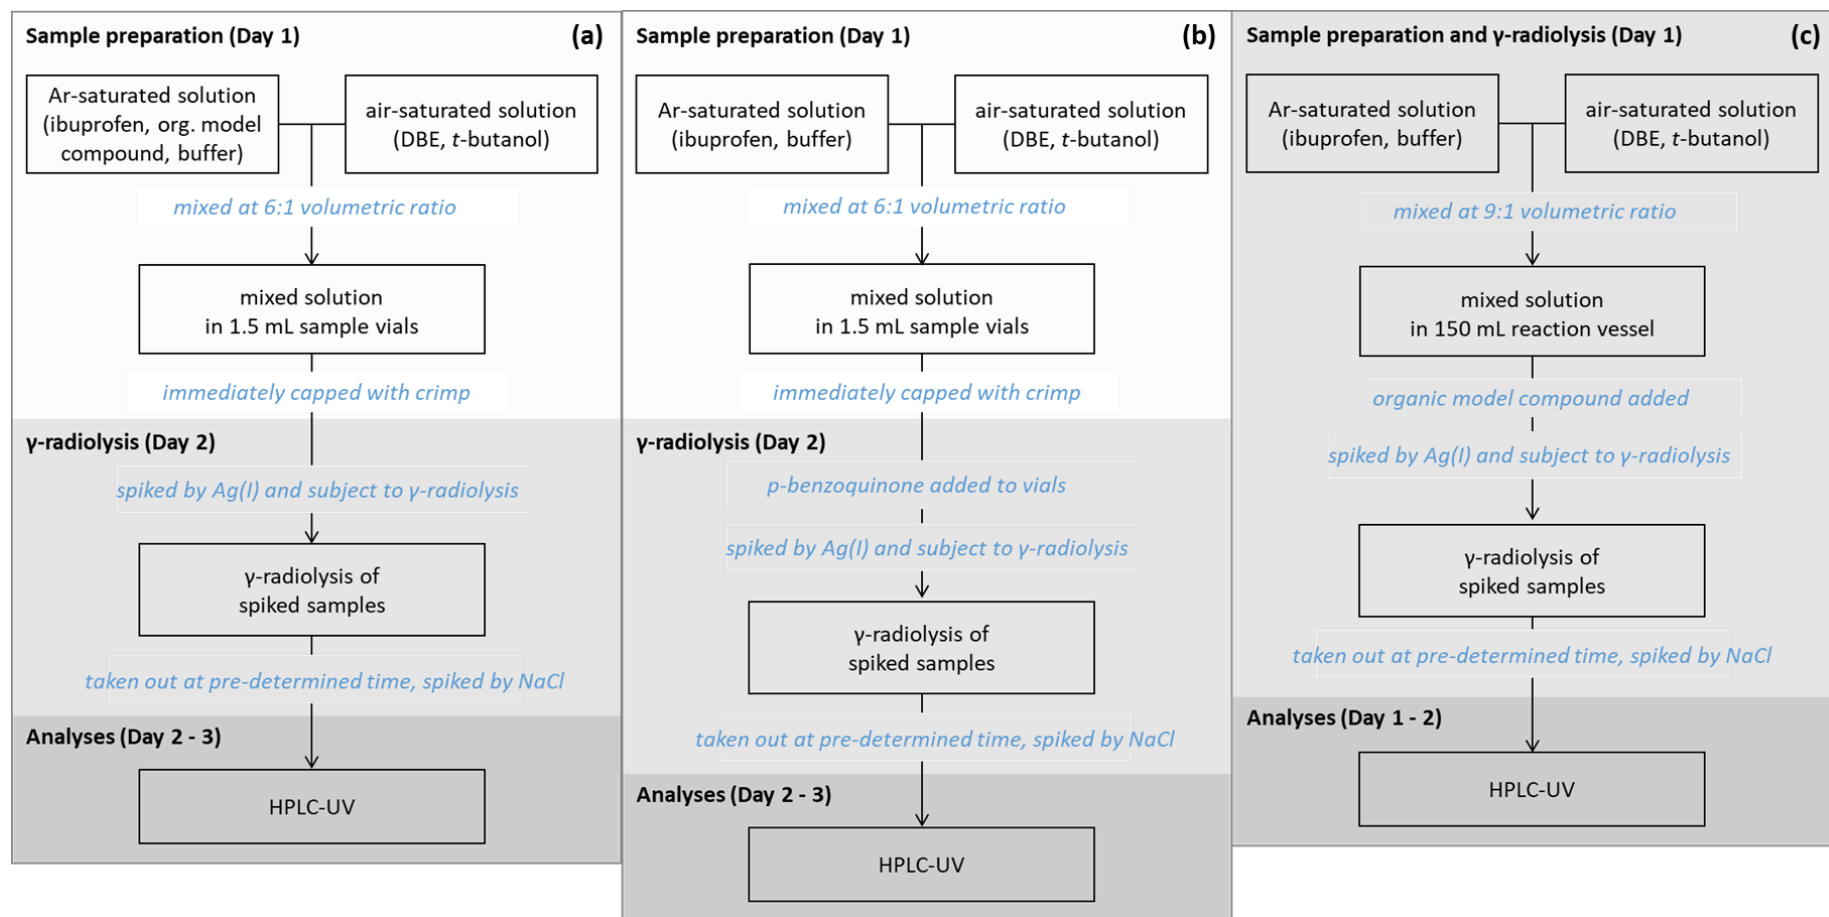

Figure S4. Flow charts of the sample preparation for kinetic experiments performed with  $\gamma$ -radiolysis for (a) most organic model compounds, (b) *p*-benzoquinone, and (c) benzene, toluene, and naphthalene. DBE stands for 1,2-dibromoethane. Background shades separate the days on which an individual step (preparation,  $\gamma$ -radiolysis, and analyses) was carried out.

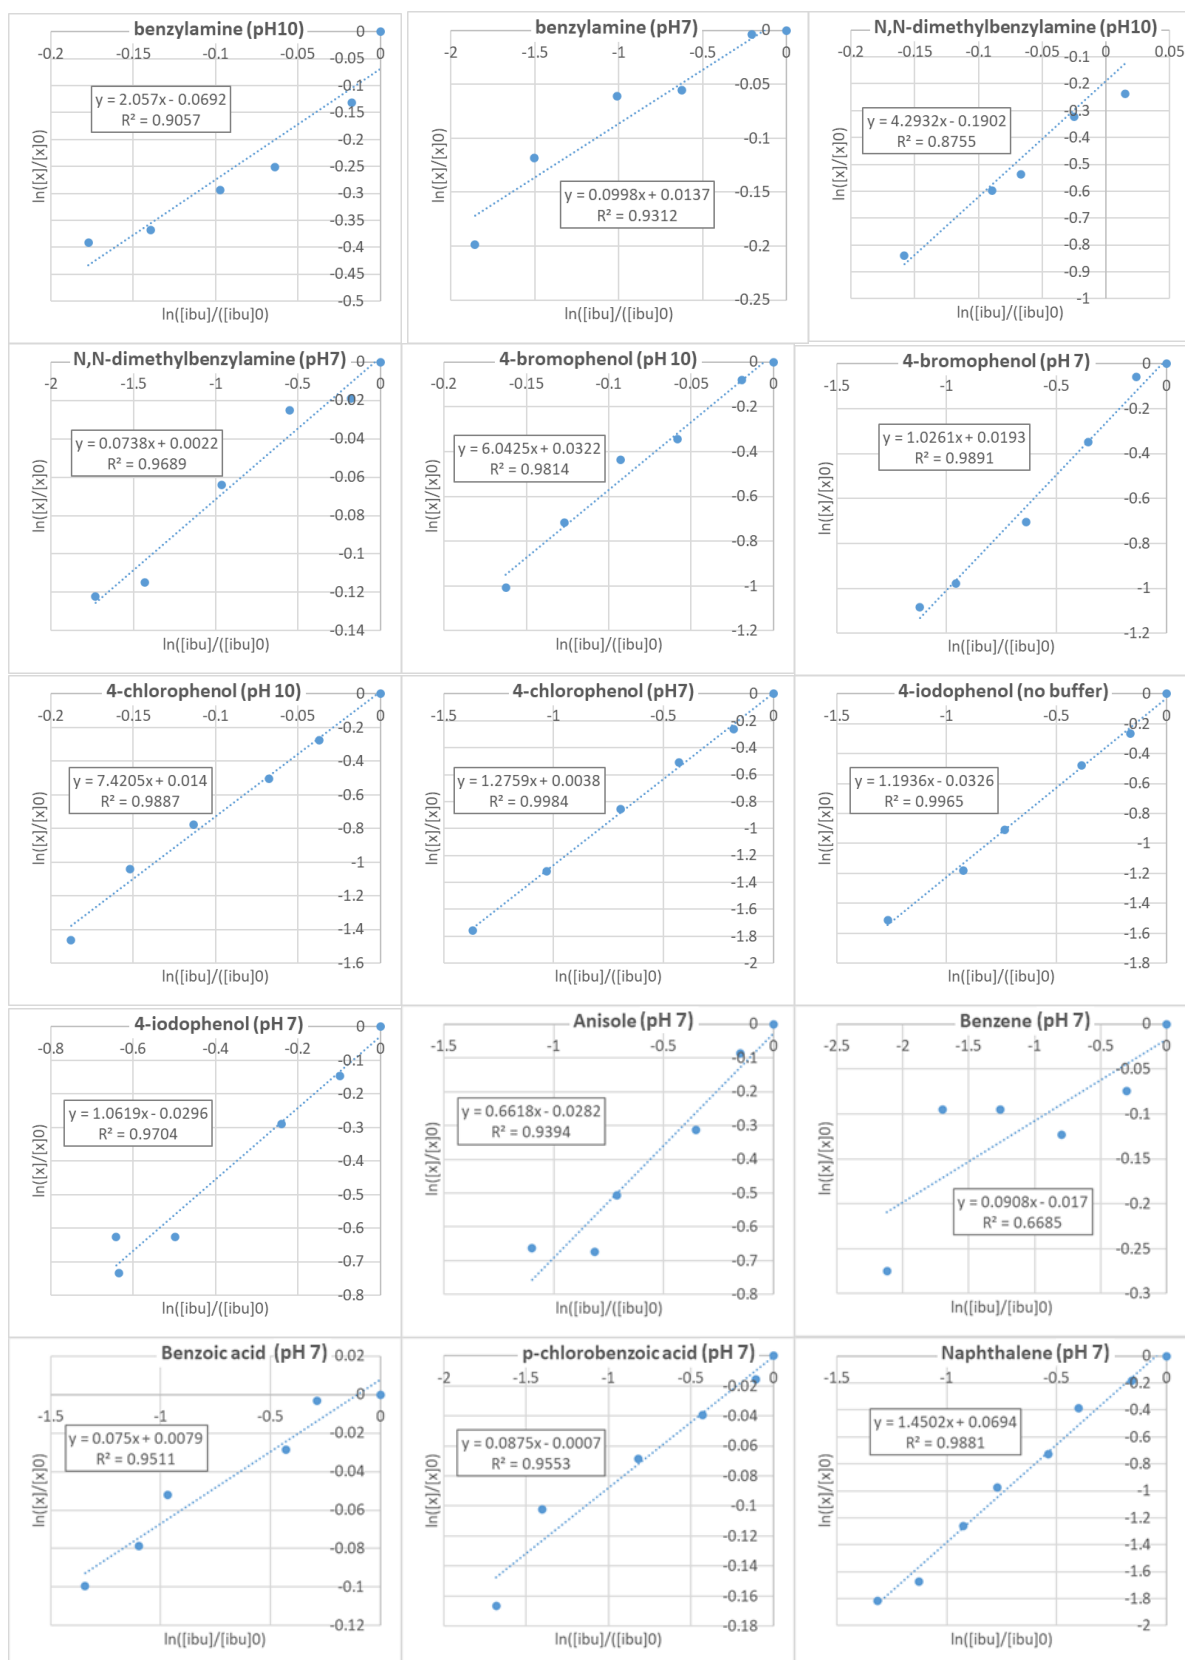

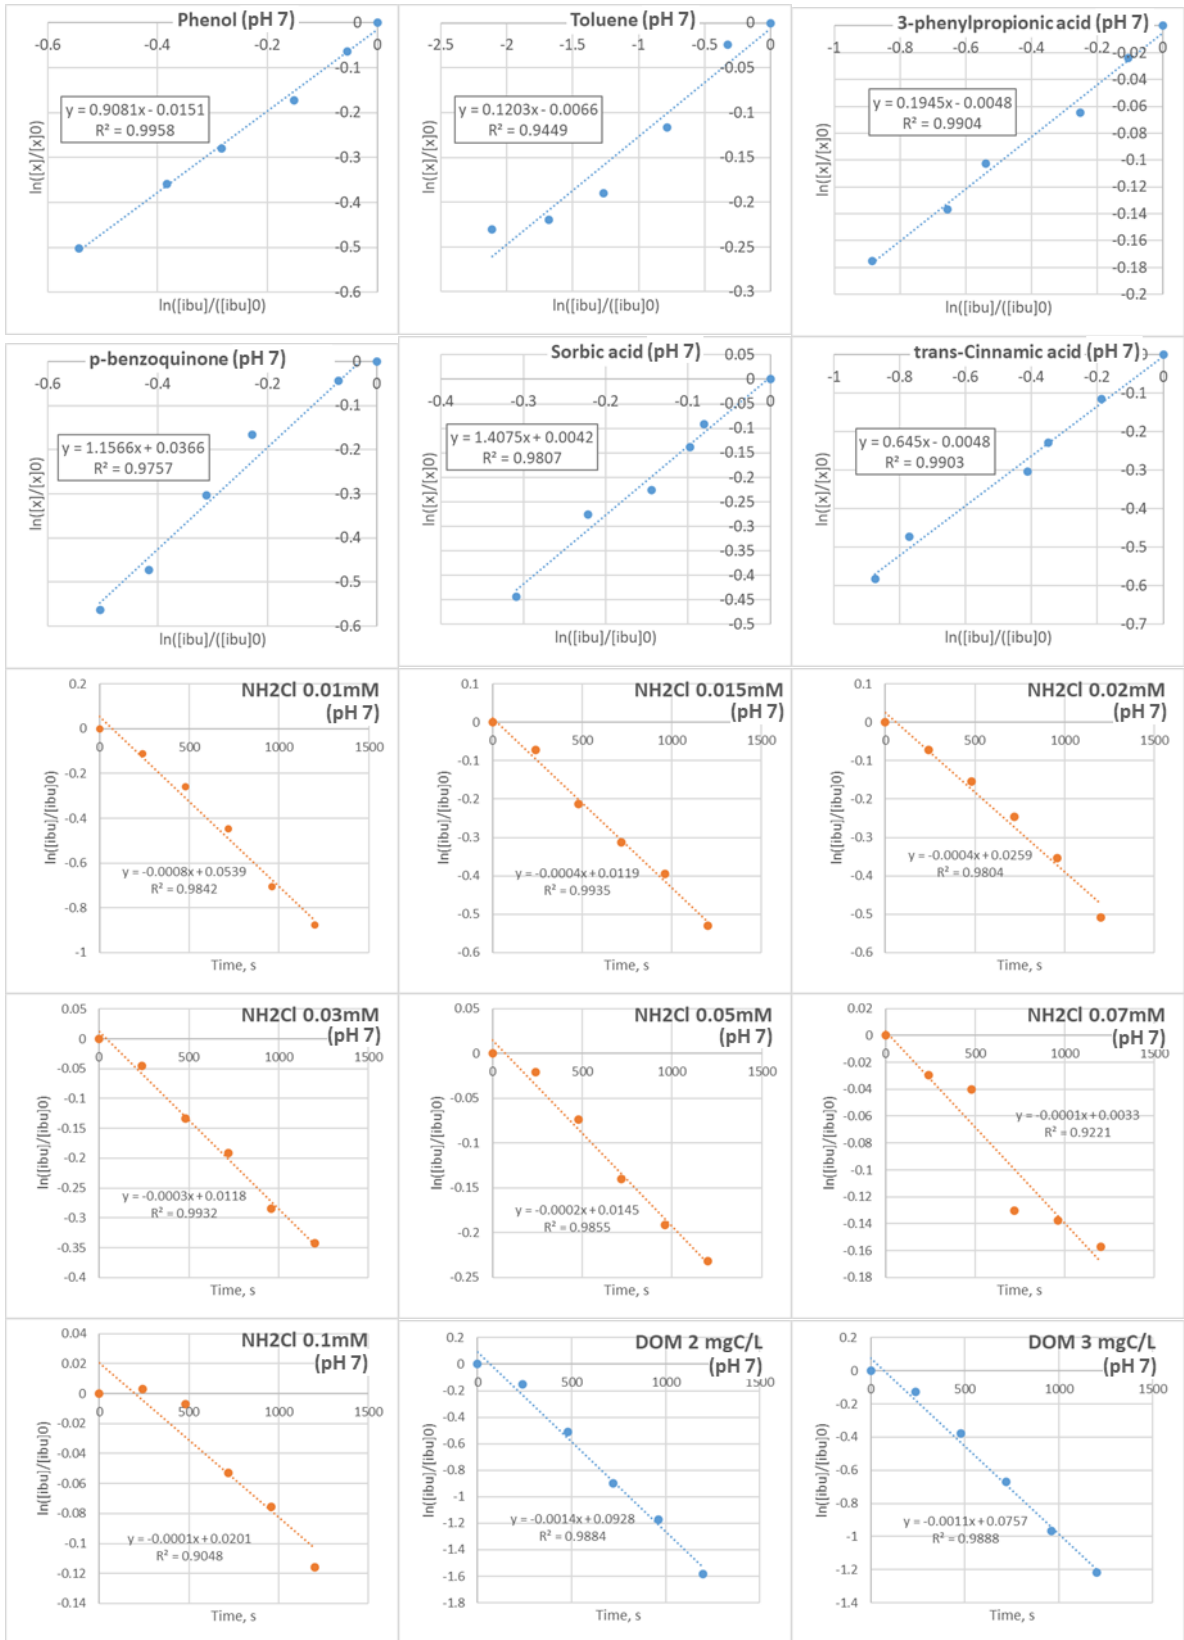



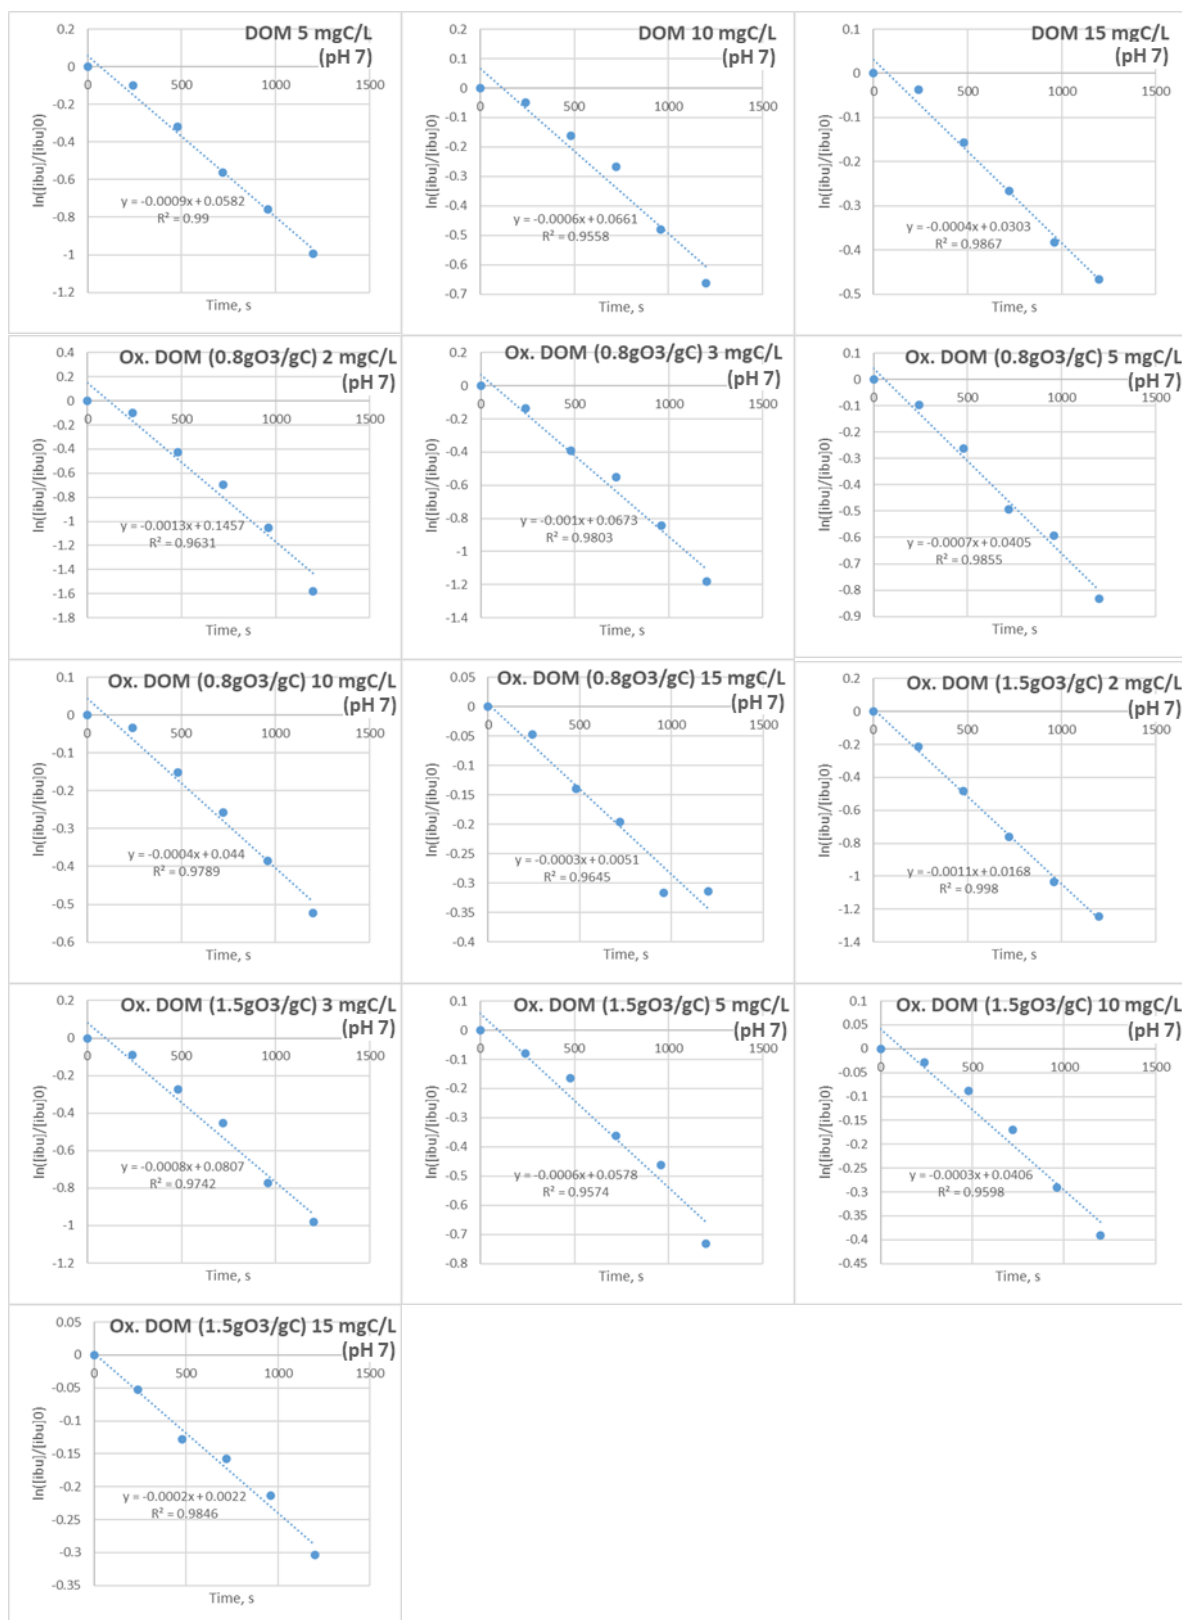

Figure S5. Competition kinetics plots for the reactions of  $\text{Br}^\bullet$  with the organic model compounds,  $\text{NH}_2\text{Cl}$ , DOM, and oxidized DOM (by 0.8  $\text{gO}_3/\text{gC}$  or 1.5  $\text{gO}_3/\text{gC}$ ) at pHs 7.1 or 10.2. Concentrations of the model compounds were fixed at 3.0 – 3.4  $\mu\text{M}$ . Concentrations of  $\text{NH}_2\text{Cl}$ , DOM, and oxidized DOM are stated in the figure headings. Data points are from a single measurement and  $k_{\text{Br}^\bullet}$  was calculated mostly based on an average of experimental duplicates.

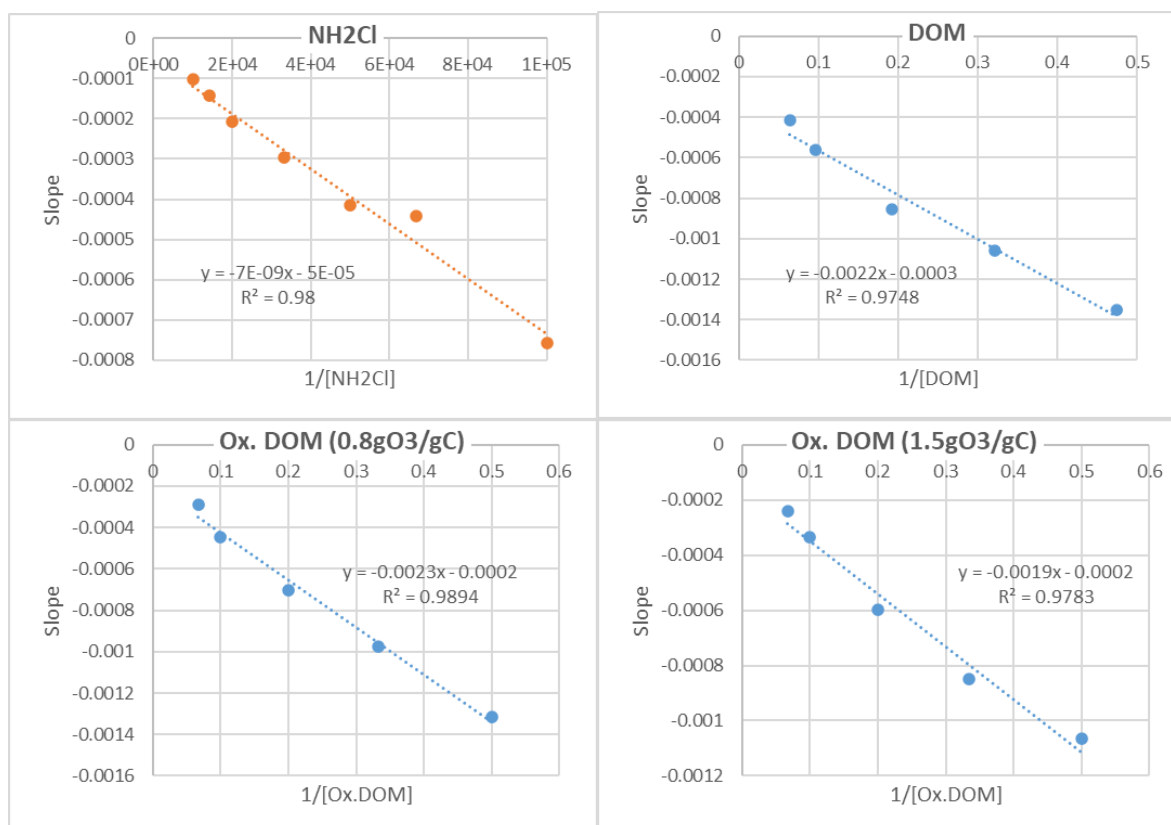

Figure S6. Slopes obtained by linear regression of data points of the competition kinetics plots (shown in Figure S5) as a function of a reciprocal of the DOC or NH<sub>2</sub>Cl concentration, to derive  $k_{Br\cdot}$  for NH<sub>2</sub>Cl, DOM, and oxidized DOM (by 0.8 gO<sub>3</sub>/gC or 1.5 gO<sub>3</sub>/gC). See Text S8 for the corresponding rate expression.

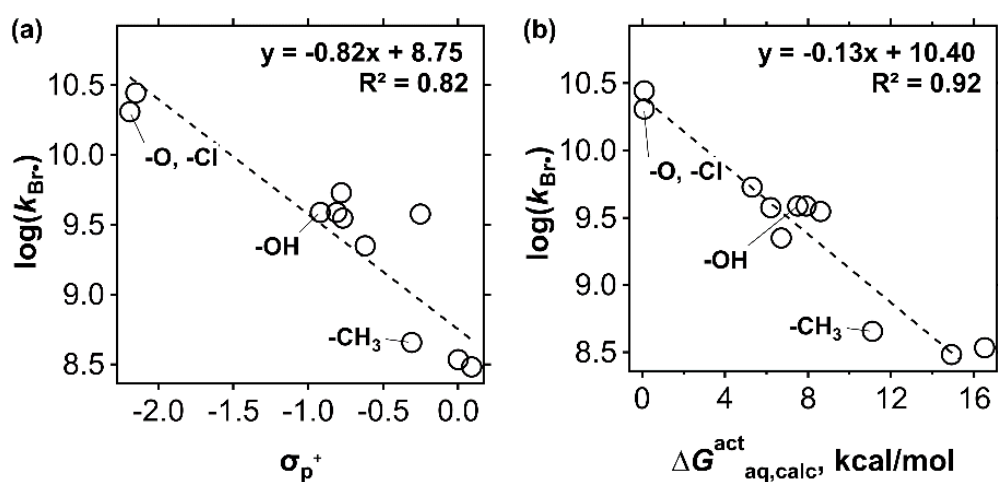

Figure S7. Quantitative structure-activity relationship of the measured  $k_{Br\cdot}$  of the selected aromatic model compounds with (a) Hammett constants and (b) computed activation energies.

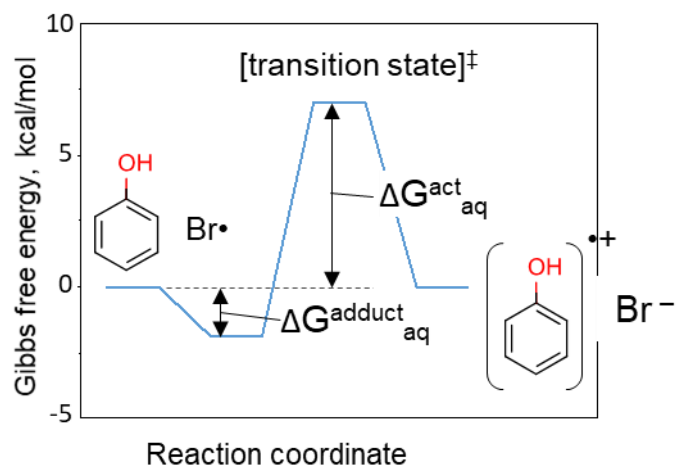

Figure S8. Schematic reaction coordinate for the reaction of phenol with  $\text{Br}^\bullet$ .

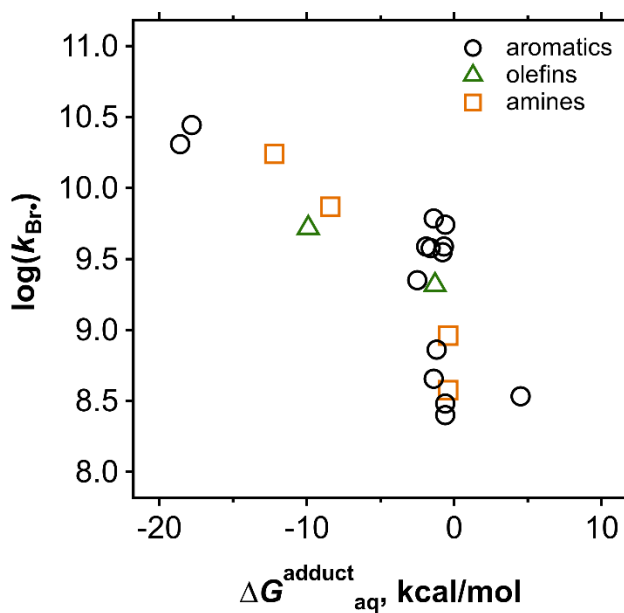

Figure S9. Correlation between the measured  $k_{\text{Br}^\bullet}$  of the selected organic model compounds and aqueous phase free energies for the formation of adducts ( $\Delta G^{\text{adduct}}_{\text{aq}}$ ).

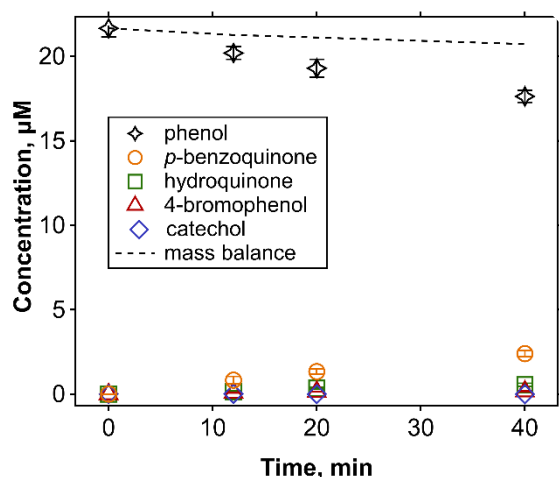

Figure S10. Concentrations of phenol and the identified products as a function of the  $\gamma$ -radiolysis time during the reaction of phenol with  $\text{Br}^\bullet$ , for the condition with 22  $\mu\text{M}$  phenol, 0.7 mM 1,2-dibromoethane, 40 mM *t*-butanol, and 50 mM phosphate buffer (pH 7.1). See Figure 2 (main text) for relative product formation.

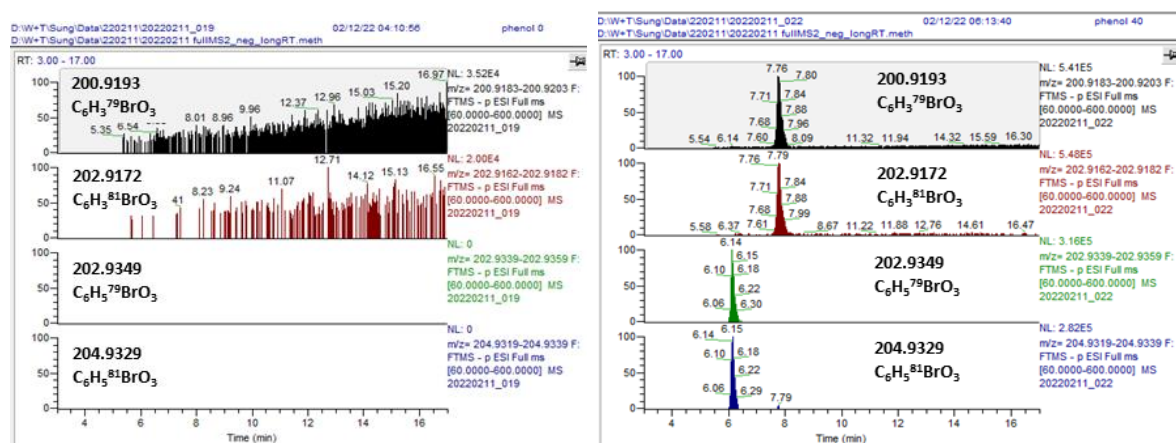

Figure S11. Left: Filtered chromatograms of a blank sample (no  $\gamma$ -radiolysis); right:  $\gamma$ -radiolysis sample ( $t = 40$  min) with exact masses of 200.9193, 202.9172, 202.9349, and 204.9329 (from top to bottom of the chromatograms) corresponding to the molecular formulas of  $\text{C}_6\text{H}_5^{79}\text{BrO}_3$ ,  $\text{C}_6\text{H}_5^{81}\text{BrO}_3$ ,  $\text{C}_6\text{H}_5^{79}\text{BrO}_3$ , and  $\text{C}_6\text{H}_5^{81}\text{BrO}_3$ .

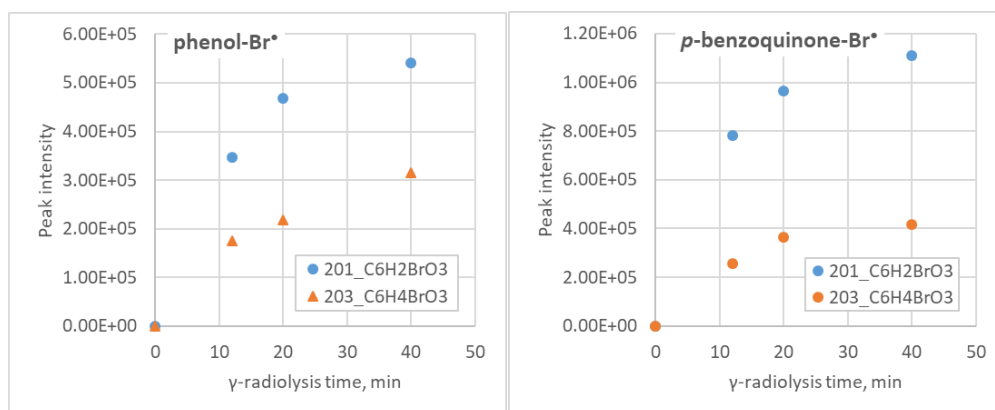

Figure S12. Trends of the peak intensity as a function of the  $\gamma$ -radiolysis time for the exact masses of 200.9193 (blue circles, corresponding to  $C_6H_2^{79}BrO_3$  as M-H) and 202.9349 (orange triangles, corresponding to  $C_6H_4^{79}BrO_3$  as M-H) during the reaction of  $Br^*$  with phenol (left) or *p*-benzoquinone (right).

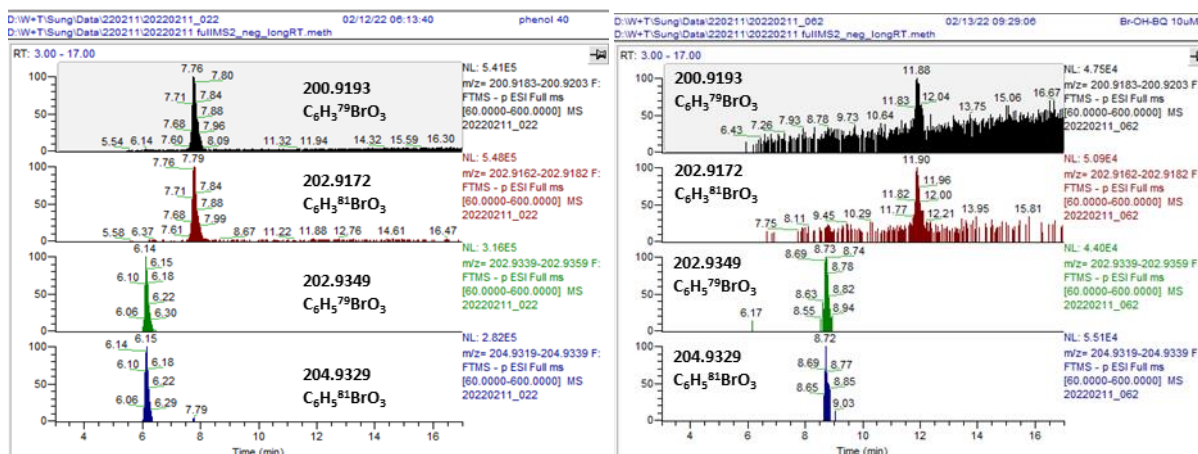

Figure S13. Left: Filtered chromatograms of a  $\gamma$ -radiolysis sample ( $t = 40$  min); right: synthesized substituted *p*-benzoquinone with the exact masses of 200.9193, 202.9172, 202.9349, and 204.9329 (from top to bottom of the chromatograms) as [M-H], corresponding to the molecular formulas  $C_6H_3^{79}BrO_3$ ,  $C_6H_3^{81}BrO_3$ ,  $C_6H_5^{79}BrO_3$ , and  $C_6H_5^{81}BrO_3$ . Retention times for  $C_6H_3BrO_3$ , and  $C_6H_5BrO_3$  are 7.8 and 6.1 min for the  $\gamma$ -radiolysis sample (left) and 11.9 and 8.7 min for the synthesized chemical (right).

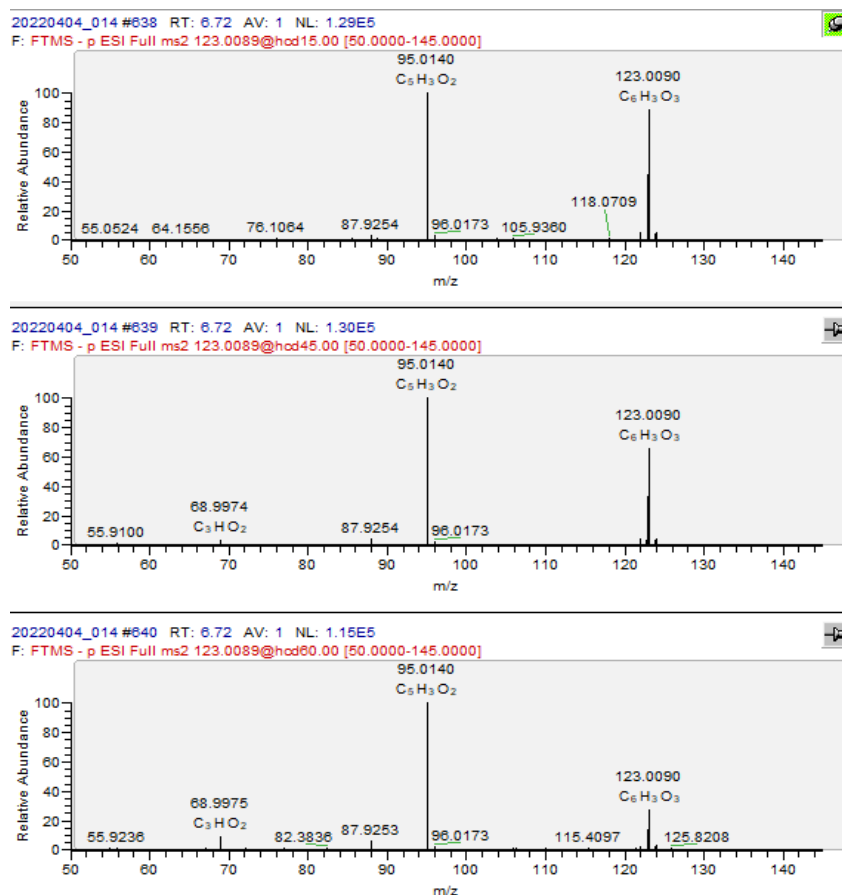

Figure S14. MS<sup>2</sup> spectra of m/z of 123.0089 (as [M-H]) with a HCD normalized collision energy (unitless) of 15 (top), 45 (middle), or 60 (bottom).

| Suspected precursor structures                                                                         | Suspected fragment structure 1                                                                                      |                                                                                                                     | Suspected fragment structure 2                                                                                      |                                                                                                                     |
|--------------------------------------------------------------------------------------------------------|---------------------------------------------------------------------------------------------------------------------|---------------------------------------------------------------------------------------------------------------------|---------------------------------------------------------------------------------------------------------------------|---------------------------------------------------------------------------------------------------------------------|
| <b>Formula</b> C <sub>6</sub> H <sub>3</sub> O <sub>3</sub><br><b>Mass</b> 123.0089<br><b>(as M-H)</b> | <b>Formula</b> [C <sub>3</sub> H <sub>2</sub> O <sub>2</sub> ]-H-<br><b>Mass</b> 68.9982<br><b>Peak m/z</b> 68.9974 | <b>Formula</b> [C <sub>5</sub> H <sub>4</sub> O <sub>2</sub> ]-H-<br><b>Mass</b> 95.0139<br><b>Peak m/z</b> 95.0140 | <b>Formula</b> [C <sub>3</sub> H <sub>2</sub> O <sub>2</sub> ]-H-<br><b>Mass</b> 68.9982<br><b>Peak m/z</b> 68.9974 | <b>Formula</b> [C <sub>5</sub> H <sub>4</sub> O <sub>2</sub> ]-H-<br><b>Mass</b> 95.0139<br><b>Peak m/z</b> 95.0140 |
|                                                                                                        |                                                                                                                     |                                                                                                                     |                                                                                                                     |                                                                                                                     |

Figure S15. Simulated fragment ions corresponding to the detected major daughter ions of m/z = 95.0140 and 68.9974. Two different suspected structures are shown for the parent ion of 123.0089 as [M-H]. The fragment ions were obtained based on an *in silico* fragmentation simulation by MetFrag.<sup>48</sup>

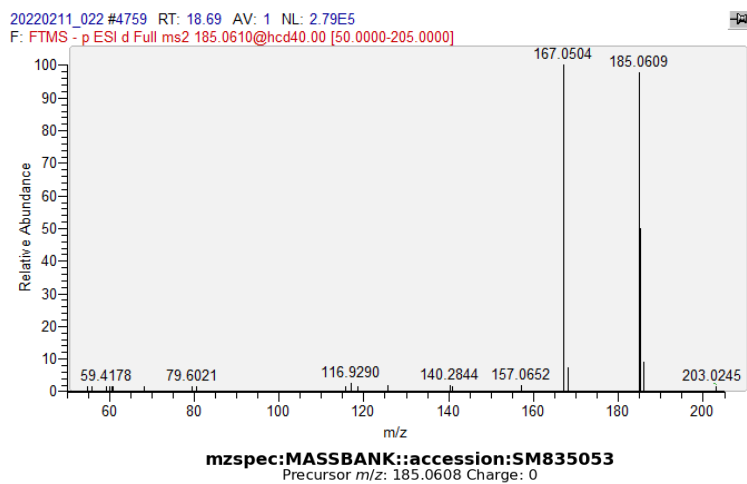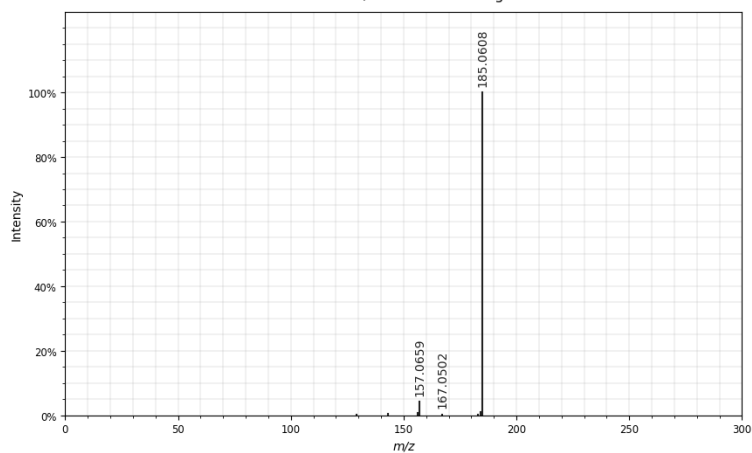

Figure S16. Top: Measured; bottom: reported MS<sup>2</sup> spectra for the exact masses of 185.0610 and 185.0608, respectively (both corresponding to C<sub>12</sub>H<sub>9</sub>O<sub>2</sub> as M-H). The reported MS<sup>2</sup> spectrum was obtained from <https://massbank.eu/MassBank/>.<sup>49</sup>

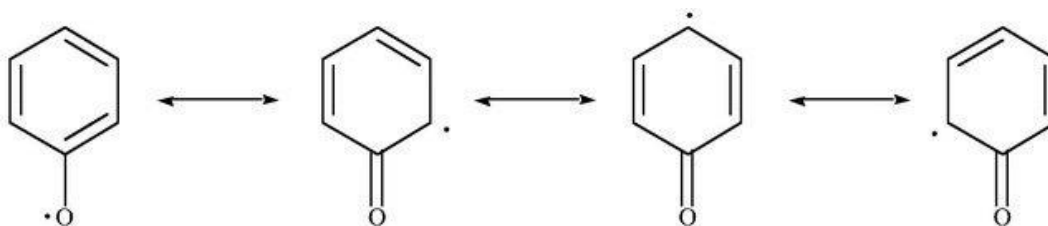

Figure S17. Resonance structures of the phenoxyl radical.

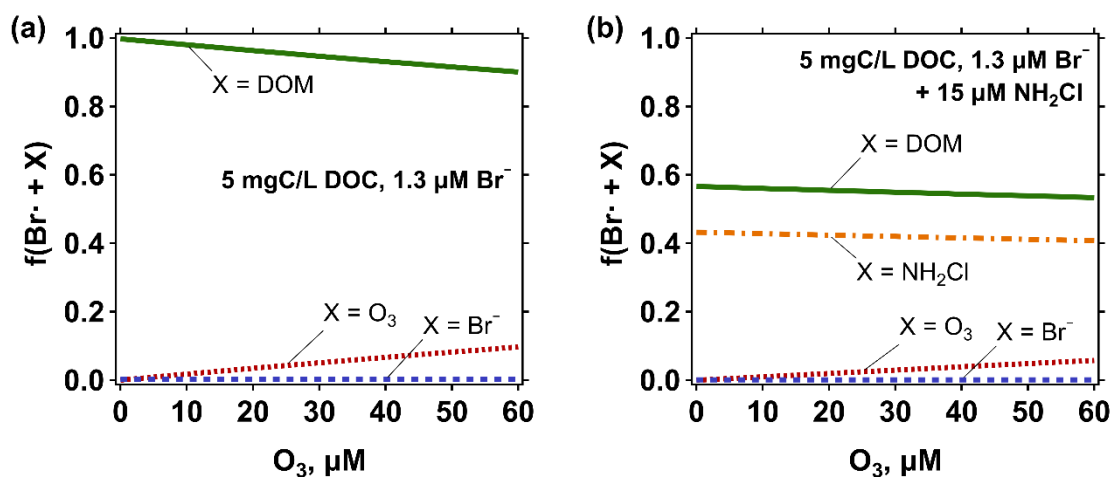

Figure S18. Calculated fractions of  $\text{Br}^*$  reacting with DOM (green line), ozone (red line), bromide (blue line), or  $\text{NH}_2\text{Cl}$  (orange line) as a function of the ozone concentration in (a) absence or (b) presence of  $\text{NH}_2\text{Cl}$ . The selected concentrations were 5 mgC/L DOC, 1.3  $\mu\text{M}$   $\text{Br}^-$  (100  $\mu\text{g/L}$   $\text{Br}^-$ ), and 15  $\mu\text{M}$   $\text{NH}_2\text{Cl}$ .

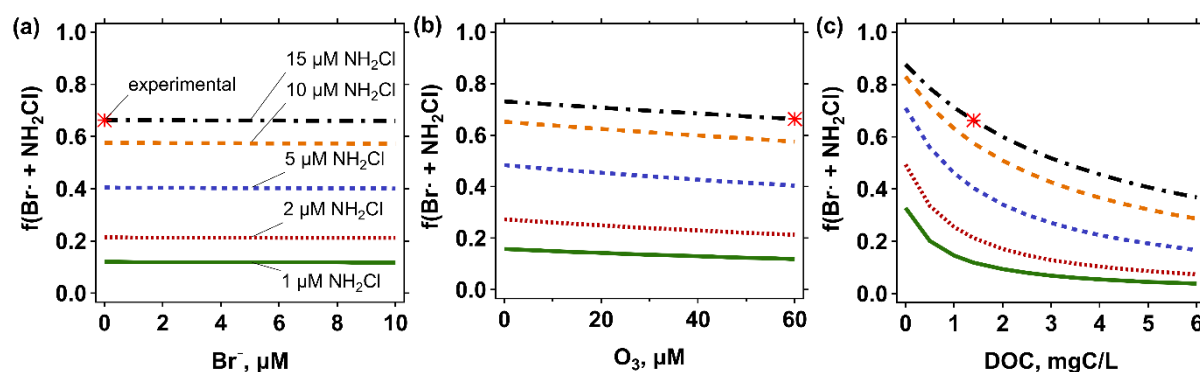

Figure S19. Calculated fractions of  $\text{Br}^*$  reacting with  $\text{NH}_2\text{Cl}$  as a function of (a) bromide, (b) ozone, or (c) DOC concentration. Lines indicate modelled  $\text{NH}_2\text{Cl}$  concentrations (1, 2, 5, 10, and 15  $\mu\text{M}$ ) and an asterisk symbol indicates the conditions applied in the ozonation experiment. Bromide, ozone, and DOC concentrations were fixed at 2  $\mu\text{M}$ , 60  $\mu\text{M}$ , and 1.4 mgC/L (corresponding to the experimental conditions) when they were not an independent variable of the plot.



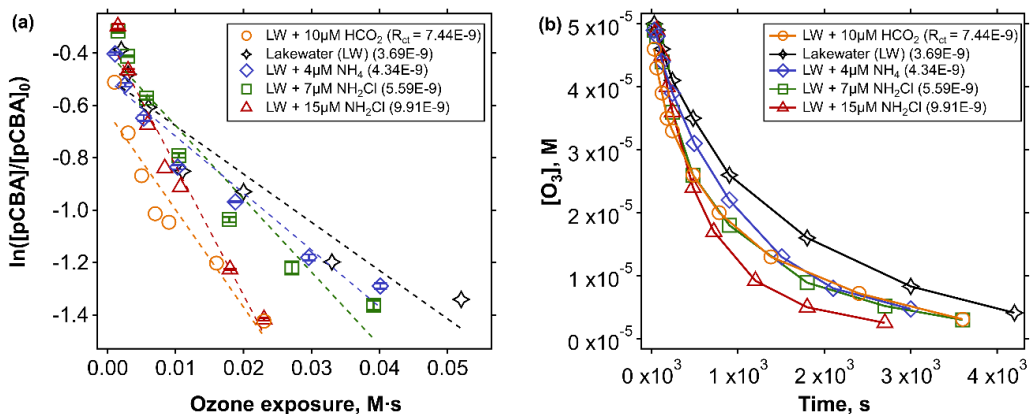

Figure S20. (a) *p*CBA abatement as a function of the ozone exposure and (b) ozone decrease as a function of reaction time, for ozonation of Lake Zurich water (1.4 mgC/L DOM, 2  $\mu M$  bromide, 1 mM phosphate buffer (pH 7.6), 5  $\mu M$  *p*CBA, and an ozone dose of 60  $\mu M$  in absence or presence of an additional agent (10  $\mu M$  formate, 4  $\mu M$  ammonium, 7  $\mu M$  NH<sub>2</sub>Cl, or 15  $\mu M$  NH<sub>2</sub>Cl). The numbers in parentheses in the legend in plot (a) indicate the  $R_{ct}$  derived from the slopes of the regression lines.

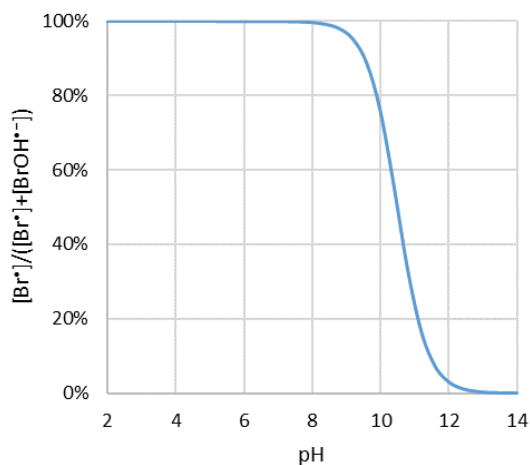

Figure S21. Fraction of  $Br^*$  in equilibrium with  $BrOH^{*-}$  as a function of pH.

(1) Electron transfer (supported by QC data)

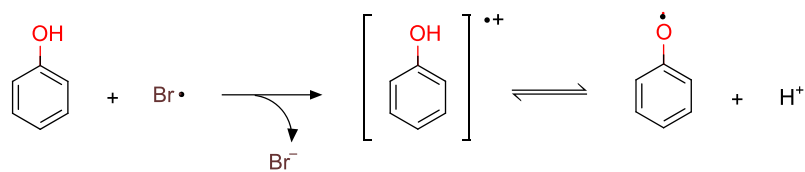

(2) H-abstraction (suggested by Merényi and Lind 1994, for alcohols)

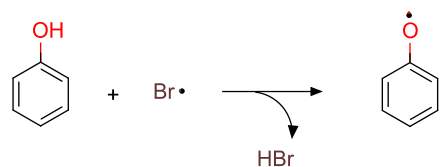

(3) Addition (suggested by Guha 1993, for olefins)

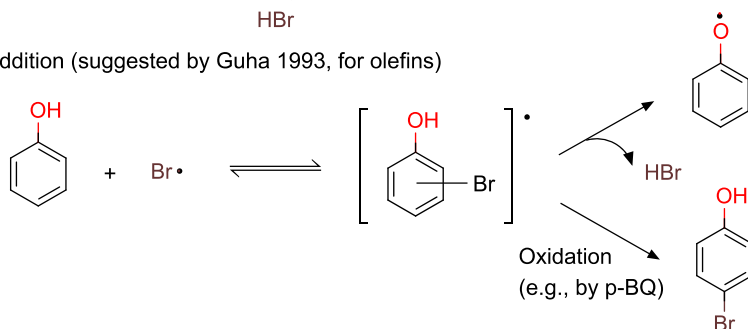

Detailed mechanism of the oxidation step of (3):

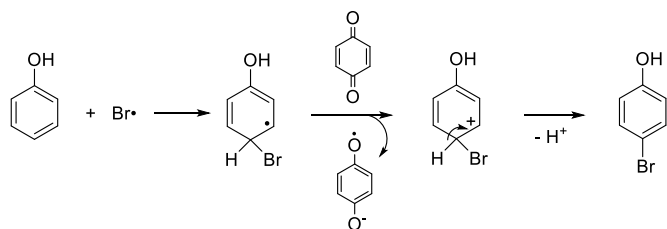

Scheme S1. Possible initial reaction pathways for the reaction of phenol with  $Br^\bullet$ .

## References

- (1) Hand, V. C.; Margerum, D. W. Kinetics and Mechanisms of the Decomposition of Dichloramine in Aqueous Solution. *Inorg. Chem.* **1983**, *22* (10), 1449–1456. <https://doi.org/10.1021/ic00152a007>.
- (2) Essaïed, K.-A.; Brown, L. V.; von Gunten, U. Reactions of Amines with Ozone and Chlorine: Two Novel Oxidative Methods to Evaluate the N-DBP Formation Potential from Dissolved Organic Nitrogen. *Water Research* **2022**, *209*, 117864. <https://doi.org/10.1016/j.watres.2021.117864>.
- (3) Walpen, N.; Houska, J.; Salhi, E.; Sander, M.; von Gunten, U. Quantification of the Electron Donating Capacity and UV Absorbance of Dissolved Organic Matter during Ozonation of Secondary Wastewater Effluent by an Assay and an Automated Analyzer. *Water Research* **2020**, *185*, 116235. <https://doi.org/10.1016/j.watres.2020.116235>.
- (4) Wenk, J.; Aeschbacher, M.; Salhi, E.; Canonica, S.; von Gunten, U.; Sander, M. Chemical Oxidation of Dissolved Organic Matter by Chlorine Dioxide, Chlorine, And Ozone: Effects on Its Optical and Antioxidant Properties. *Environ. Sci. Technol.* **2013**, *47* (19), 11147–11156. <https://doi.org/10.1021/es402516b>.
- (5) Rougé, V.; von Gunten, U.; Allard, S. Efficiency of Pre-Oxidation of Natural Organic Matter for the Mitigation of Disinfection Byproducts: Electron Donating Capacity and UV Absorbance as Surrogate Parameters. *Water Research* **2020**, 116418. <https://doi.org/10.1016/j.watres.2020.116418>.
- (6) Donati, A. Spectroscopic and Kinetic Investigations of Halogen Containing Radicals in the Tropospheric Aqueous Phase, University of Leipzig, Leipzig, Germany, 2002. <http://d-nb.info/967494907>.
- (7) Ershov, B. G.; Kelm, M.; Gordeev, A. V.; Janata, E. A Pulse Radiolysis Study of the Oxidation of Br<sup>-</sup> by Cl<sub>2</sub><sup>-</sup> in Aqueous Solution: Formation and Properties of ClBr<sup>-</sup>. *Phys. Chem. Chem. Phys.* **2002**, *4* (10), 1872–1875. <https://doi.org/10.1039/B110362H>.
- (8) Valentine, R. L.; Brandt, K. I.; Jafvert, C. T. A Spectrophotometric Study of the Formation of an Unidentified Monochloramine Decomposition Product. *Water Research* **1986**, *20* (8), 1067–1074. [https://doi.org/10.1016/0043-1354\(86\)90051-5](https://doi.org/10.1016/0043-1354(86)90051-5).
- (9) 4500-Cl Chlorine (Residual). In *Standard method for examination of water and wastewater*; American Public Health Association (APHA).
- (10) von Gunten, U.; Oliveras, Y. Advanced Oxidation of Bromide-Containing Waters: Bromate Formation Mechanisms. *Environ. Sci. Technol.* **1998**, *32* (1), 63–70. <https://doi.org/10.1021/es970477j>.
- (11) Allen, A. O.; Hochanadel, C. J.; Ghormley, J. A.; Davis, T. W. Decomposition of Water and Aqueous Solutions Under Mixed Fast Neutron and Gamma Radiation. *The Journal of Physical Chemistry* **1952**, *56* (5), 575–586.
- (12) Lal, M.; Mahal, H. S. Reactions of Alkylbromides with Free Radicals in Aqueous Solutions. *International Journal of Radiation Applications and Instrumentation. Part C. Radiation Physics and Chemistry* **1992**, *40* (1), 23–26. [https://doi.org/10.1016/1359-0197\(92\)90134-2](https://doi.org/10.1016/1359-0197(92)90134-2).
- (13) Merényi, G.; Lind, J. Reaction Mechanism of Hydrogen Abstraction by the Bromine Atom in Water. *J. Am. Chem. Soc.* **1994**, *116* (17), 7872–7876. <https://doi.org/10.1021/ja00096a050>.
- (14) Guha, S. N.; Schoneich, C.; Asmus, K. D. Free Radical Reductive Degradation of Vic-Dibromoalkanes and Reaction of Bromine Atoms with Polyunsaturated Fatty Acids: Possible Involvement of Br<sup>•</sup> in the 1,2-Dibromoethane-Induced Lipid-Peroxidation. *Archives of Biochemistry and Biophysics* **1993**, *305* (1), 132–140. <https://doi.org/10.1006/abbi.1993.1402>.
- (15) Lal, M.; Mönig, J.; Asmus, K.-D.; Wardman, P. Free Radical Induced Degradation of 1, 2-Dibromoethane. Generation of Free Br<sup>+</sup> Atoms. *Free Radical Research Communications* **1986**, *1* (4), 235–241. <https://doi.org/10.3109/10715768609051633>.
- (16) Klänning, U. K.; Wolff, T. Laser Flash Photolysis of HClO, ClO<sup>-</sup>, HBrO, and BrO<sup>-</sup> in Aqueous Solution. Reactions of Cl<sup>-</sup> and Br<sup>-</sup> Atoms. *Berichte der Bunsengesellschaft für physikalische Chemie* **1985**, *89* (3), 243–245. <https://doi.org/10.1002/bbpc.19850890309>.

- (17) Nauser, T.; Carreras, A. Carbon-Centered Radicals Add Reversibly to Histidine – Implications. *Chem. Commun.* **2014**, *50* (92), 14349–14351. <https://doi.org/10.1039/C4CC05316H>.
- (18) Beaumont, P. C.; Powers, E. L. Radiation Sensitivity of DNA-Metal Complexes: A Pulse Radiolysis Study. *International Journal of Radiation Biology and Related Studies in Physics, Chemistry and Medicine* **1983**, *43* (5), 485–494. <https://doi.org/10.1080/09553008314550581>.
- (19) Armstrong, D. A.; Huie, R. E.; Koppenol, W. H.; Lymar, S. V.; Merényi, G.; Neta, P.; Ruscic, B.; Stanbury, D. M.; Steenken, S.; Wardman, P. Standard Electrode Potentials Involving Radicals in Aqueous Solution: Inorganic Radicals (IUPAC Technical Report). *Pure and Applied Chemistry* **2015**, *87* (11–12), 1139–1150. <https://doi.org/10.1515/pac-2014-0502>.
- (20) Zhang, H.; Mostafavi, M. UV-Absorption Observation of the Silver Bromide Growth from a Single Molecule to the Crystal in Solution. *J. Phys. Chem. B* **1997**, *101* (42), 8443–8448. <https://doi.org/10.1021/jp9712821>.
- (21) von Sonntag, C.; von Gunten, U. *Chemistry of Ozone in Water and Wastewater Treatment*; IWA Publishing, 2012.
- (22) Marenich, A. V.; Cramer, C. J.; Truhlar, D. G. Universal Solvation Model Based on Solute Electron Density and on a Continuum Model of the Solvent Defined by the Bulk Dielectric Constant and Atomic Surface Tensions. *The Journal of Physical Chemistry B* **2009**, *113* (18), 6378–6396. <https://doi.org/10.1021/jp810292n>.
- (23) Zhao, Y.; Truhlar, D. G. The M06 Suite of Density Functionals for Main Group Thermochemistry, Thermochemical Kinetics, Noncovalent Interactions, Excited States, and Transition Elements: Two New Functionals and Systematic Testing of Four M06-Class Functionals and 12 Other Functionals. *Theoretical Chemistry Accounts* **2008**, *120* (1), 215–241. <https://doi.org/10.1007/s00214-007-0310-x>.
- (24) Bryantsev, V. S.; Diallo, M. S.; Goddard III, W. A. Calculation of Solvation Free Energies of Charged Solutes Using Mixed Cluster/Continuum Models. *J. Phys. Chem. B* **2008**, *112* (32), 9709–9719. <https://doi.org/10.1021/jp802665d>.
- (25) Tomaník, L.; Muchová, E.; Slavíček, P. Solvation Energies of Ions with Ensemble Cluster-Continuum Approach. *Phys. Chem. Chem. Phys.* **2020**, *22* (39), 22357–22368. <https://doi.org/10.1039/D0CP02768E>.
- (26) Purvis, G. D.; Bartlett, R. J. A Full Coupled-cluster Singles and Doubles Model: The Inclusion of Disconnected Triples. *J. Chem. Phys.* **1982**, *76* (4), 1910–1918. <https://doi.org/10.1063/1.443164>.
- (27) Montgomery, J. A.; Frisch, M. J.; Ochterski, J. W.; Petersson, G. A. A Complete Basis Set Model Chemistry. VI. Use of Density Functional Geometries and Frequencies. *The Journal of Chemical Physics* **1999**, *110* (6), 2822–2827. <https://doi.org/10.1063/1.477924>.
- (28) Montgomery, J. A.; Frisch, M. J.; Ochterski, J. W.; Petersson, G. A. A Complete Basis Set Model Chemistry. VII. Use of the Minimum Population Localization Method. *J. Chem. Phys.* **2000**, *112* (15), 6532–6542. <https://doi.org/10.1063/1.481224>.
- (29) Wavefunction, Inc. Wavefunction, I. Spartan'18, 2018.
- (30) Halgren, T. A.; Nachbar, R. B. Merck Molecular Force Field. IV. Conformational Energies and Geometries for MMFF94. *Journal of Computational Chemistry* **1996**, *17* (5–6), 587–615. [https://doi.org/10.1002/\(SICI\)1096-987X\(199604\)17:5/6<587::AID-JCC4>3.0.CO;2-Q](https://doi.org/10.1002/(SICI)1096-987X(199604)17:5/6<587::AID-JCC4>3.0.CO;2-Q).
- (31) Marcus, R. A. Chemical and Electrochemical Electron-Transfer Theory. *Annual Review of Physical Chemistry* **1964**, *15* (1), 155–196. <https://doi.org/10.1146/annurev.pc.15.100164.001103>.
- (32) Raghavan, N. V.; Steenken, S. Electrophilic Reaction of the Hydroxyl Radical with Phenol. Determination of the Distribution of Isomeric Dihydroxycyclohexadienyl Radicals. *J. Am. Chem. Soc.* **1980**, *102* (10), 3495–3499. <https://doi.org/10.1021/ja00530a031>.
- (33) Acero, J. L.; Piriou, P.; von Gunten, U. Kinetics and Mechanisms of Formation of Bromophenols during Drinking Water Chlorination: Assessment of Taste and Odor Development. *Water Research* **2005**, *39* (13), 2979–2993. <https://doi.org/10.1016/j.watres.2005.04.055>.

- (34) Tee, O. S.; Paventi, M.; Bennett, J. M. Kinetics and Mechanism of the Bromination of Phenols and Phenoxide Ions in Aqueous Solution. Diffusion-Controlled Rates. *J. Am. Chem. Soc.* **1989**, *111* (6), 2233–2240. <https://doi.org/10.1021/ja00188a044>.
- (35) Buffle, M.-O.; Galli, S.; von Gunten, U. Enhanced Bromate Control during Ozonation: The Chlorine-Ammonia Process. *Environ. Sci. Technol.* **2004**, *38* (19), 5187–5195. <https://doi.org/10.1021/es0352146>.
- (36) Neemann, J.; Hulse, R.; Rexing, D.; Wert, E. Controlling Bromate Formation: During Ozonation With Chlorine and Ammonia. *Journal - AWWA* **2004**, *96* (2), 26–28. <https://doi.org/10.1002/j.1551-8833.2004.tb10542.x>.
- (37) Haag, W. R.; Hoigné, J.; Bader, H. Improved Ammonia Oxidation by Ozone in the Presence of Bromide Ion during Water Treatment. *Water Research* **1984**, *18* (9), 1125–1128. [https://doi.org/10.1016/0043-1354\(84\)90227-6](https://doi.org/10.1016/0043-1354(84)90227-6).
- (38) Poskrebyshev, G. A.; Huie, R. E.; Neta, P. Radiolytic Reactions of Monochloramine in Aqueous Solutions. *J. Phys. Chem. A* **2003**, *107* (38), 7423–7428. <https://doi.org/10.1021/jp030198k>.
- (39) Gleason, J. M.; McKay, G.; Ishida, K. P.; Mezyk, S. P. Temperature Dependence of Hydroxyl Radical Reactions with Chloramine Species in Aqueous Solution. *Chemosphere* **2017**, *187*, 123–129. <https://doi.org/10.1016/j.chemosphere.2017.08.053>.
- (40) Lei, Y.; Lei, X.; Westerhoff, P.; Tong, X.; Ren, J.; Zhou, Y.; Cheng, S.; Ouyang, G.; Yang, X. Bromine Radical ( $\text{Br}\cdot$  and  $\text{Br}_2\cdot^-$ ) Reactivity with Dissolved Organic Matter and Brominated Organic Byproduct Formation. *Environ. Sci. Technol.* **2022**, *56* (8), 5189–5199. <https://doi.org/10.1021/acs.est.2c00549>.
- (41) Zhan, C.-G.; Dixon, D. A. Hydration of the Fluoride Anion: Structures and Absolute Hydration Free Energy from First-Principles Electronic Structure Calculations. *J. Phys. Chem. A* **2004**, *108* (11), 2020–2029. <https://doi.org/10.1021/jp0311512>.
- (42) Tissandier, M. D.; Cowen, K. A.; Feng, W. Y.; Gundlach, E.; Cohen, M. H.; Earhart, A. D.; Coe, J. V.; Tuttle, T. R. The Proton's Absolute Aqueous Enthalpy and Gibbs Free Energy of Solvation from Cluster-Ion Solvation Data. *J. Phys. Chem. A* **1998**, *102* (40), 7787–7794. <https://doi.org/10.1021/jp982638r>.
- (43) Wardman, P. Reduction Potentials of One-Electron Couples Involving Free Radicals in Aqueous Solution. *Journal of Physical and Chemical Reference Data* **1989**, *18* (4), 1637–1755. <https://doi.org/10.1063/1.555843>.
- (44) Pearson, R. G. Ionization Potentials and Electron Affinities in Aqueous Solution. *J. Am. Chem. Soc.* **1986**, *108* (20), 6109–6114. <https://doi.org/10.1021/ja00280a002>.
- (45) Jonsson, M.; Lind, J.; Reitberger, T.; Eriksen, T. E.; Merenyi, G. Redox Chemistry of Substituted Benzenes: The One-Electron Reduction Potentials of Methoxy-Substituted Benzene Radical Cations. *J. Phys. Chem.* **1993**, *97* (43), 11278–11282. <https://doi.org/10.1021/j100145a027>.
- (46) Lal, M. Free  $\dot{\text{B}}\text{r}$  Atom and Free Radical Reactions in the Radiolysis of 1,2-Dibromoethane (DBE) and Other Bromohydrocarbons in Air-Free Aqueous Solutions. *International Journal of Radiation Applications and Instrumentation. Part C. Radiation Physics and Chemistry* **1988**, *32* (6), 741–745. [https://doi.org/10.1016/1359-0197\(88\)90161-0](https://doi.org/10.1016/1359-0197(88)90161-0).
- (47) Buxton, G. V.; Greenstock, C. L.; Helman, W. P.; Ross, A. B. Critical Review of Rate Constants for Reactions of Hydrated Electrons, Hydrogen Atoms and Hydroxyl Radicals ( $\cdot\text{OH}/\cdot\text{O}^-$  in Aqueous Solution. *Journal of Physical and Chemical Reference Data* **1988**, *17* (2), 513–886. <https://doi.org/10.1063/1.555805>.
- (48) Ruttkies, C.; Schymanski, E. L.; Wolf, S.; Hollender, J.; Neumann, S. MetFrag Relaunch: Incorporating Strategies beyond in Silico Fragmentation. *J. Cheminform* **2016**, *8* (1), 3. <https://doi.org/10.1186/s13321-016-0115-9>.
- (49) Schulze, T.; Meier, R.; Alygizakis, N.; Schymanski, E.; Bach, E.; D.H. Li; Lauperbe; Raalizadeh; Tanaka, S.; Witting, M. MassBank/MassBank-Data: Release Version 2021.12, 2021. <https://doi.org/10.5281/ZENODO.5775684>.
